# Supplementary material
Source: publisher figshare collection journal article supplement (https://acs.figshare.com/ndownloader/files/5218906)
Supplement: Supplementary file 1 [file 5218906]

# CIF-file generated for  C22H55N4Si2Y (1)                  CP576    

#==============================================================================
data_global
#==============================================================================

# 0. AUDIT DETAILS

_audit_creation_date                 '2001-01-16  14:21:39'
_audit_creation_method               'PLATON <TABLE ACC> option' 
_audit_update_record                
;
 ?
;

#===============================================================================

# 1. SUBMISSION DETAILS

_publ_contact_author_name           # Name  of author for correspondence
;
   Drs. A. Meetsma
;
_publ_contact_author_address        # Address of author for correspondence
;
     Crystal Structure Center,
     Inorganic Solid State Chemistry Laboratory
     Chemical Physics,
     Materials Science Center,
     Groningen University,
     Nijenborgh 4,
     NL-9747 AG Groningen,
     The Netherlands.
;
_publ_contact_author_email           A.Meetsma@fwn.rug.nl
_publ_contact_author_fax             '+31 50 3634441'
_publ_contact_author_phone           '+31 50 3634368'

_publ_requested_journal              'Organometallics' 
# Publication choise FI FM FO CI CM CO
_publ_requested_category             ?
_publ_requested_coeditor_name        ?

_publ_contact_letter                # Include date of submission
;
 Date of submission :  2003-12-08

 Consider this CIF submission for deposition of the second
 X-ray structure of a manuscript to be submitted to : Organometallics
  (Our Compound_Identification_Code : CP576)
;

#===============================================================================

# 2. PROCESSING SUMMARY (JOURNAL OFFICE ONLY)

_journal_date_recd_electronic        ?

_journal_date_to_coeditor            ?
_journal_date_from_coeditor          ?
_journal_date_accepted               ?

_journal_date_printers_first         ?
_journal_date_printers_final         ?
_journal_date_proofs_out             ?
_journal_date_proofs_in              ?

_journal_coeditor_name               ?
_journal_coeditor_code               ?
_journal_coeditor_notes             
; ?
;

_journal_techeditor_code             ?
_journal_techeditor_notes           
; ?
;

_journal_coden_ASTM                  ?
_journal_name_full                   ?
_journal_year                        ?
_journal_volume                      ?
_journal_issue                       ?
_journal_page_first                  ?
_journal_page_last                   ?


_journal_suppl_publ_number           ?
_journal_suppl_publ_pages            ?


#===============================================================================

# 3. TITLE AND AUTHOR LIST

_publ_section_title                 
;
 ?
;
_publ_section_title_footnote        
;
 ?
;

# The loop structure below should contain the names and adresses of all
# authors, in the required order of publication. Repeat as necessary.


loop_
_publ_author_name                   
_publ_author_footnote               
_publ_author_address                

   'Meetsma, Auke'
;
 ? # author related footnote
;
;
     Crystal Structure Center,
     Inorganic Solid State Chemistry Laboratory
     Chemical Physics,
     Materials Science Center,
     Groningen University,
     Nijenborgh 4,
     NL-9747 AG Groningen,
     The Netherlands.
;

#===============================================================================

# 4. TEXT

_publ_section_synopsis              
;
 ?
;
_publ_section_abstract              
;
 ?
;

# Insert blank lines between paragraphs

_publ_section_comment               
;
 ?
;
_publ_section_exptl_prep            
;
 ?
;
_publ_section_exptl_refinement      
;
 ?
;

# Insert blank lines between references

_publ_section_references            
;

 Beurskens, P.T., Beurskens, G., Gelder, R. de   Garc\'ia-Granda, S.
  Gould, R.O.  Isra\"el, & Smits, J.M.M. (1999).
  The DIRDIF99 program system, Technical Report of the Crystallography 
   Laboratory, University of Nijmegen, The Netherlands.

 Bondi, A. (1964). J. Phys. Chem. 68, 441-451.

 Bruker, (2000). SMART, SAINT, SADABS, XPREP and  SHELXTL/NT.
  Software Reference Manual Bruker AXS Inc. Madison, Wisconsin, USA.

 International Tables for Crystallography (1983). Vol. A. 
   Space-group symmetry, edited by T. Hahn. Dordrecht: Reidel.
   (Present distributor Kluwer Academic Publishers, Dordrecht).

 International Tables for Crystallography (1992). Vol. C. 
   Edited by A.J.C Wilson, Kluwer Academic Publishers, 
   Dordrecht, The Netherlands.

 Le Page, Y. (1987). J. Appl. Cryst. 20, 264-269.

 Le Page, Y. (1988). J. Appl. Cryst. 21, 983-984.

 Meetsma, A. (2000). Extended version of the program PLUTO. 
   Groningen University, The Netherlands. (unpublished). 


 Sheldrick, G.M. SHELXL97. Program for crystal structure
   refinement. University of G\"ottingen, Germany, 1997.

 Sheldrick, G.M. SHELXS97. Program for Crystal Structure
   solution. University of G\"ottingen, Germany, 1997.

 Sheldrick, G.M. SADABS. Version 2. Empirical Absorption Correction Program.
   University of G\"ottingen, Germany, 2000

 Spek, A.L. (1988). J. Appl. Cryst. 21, 578-579.

 Spek, A.L. (1990). Acta Cryst. A46, C-34.

 Spek, A.L. (1997). HELENA, Program for Datareduction, Utrecht
   University, The Netherlands.

 Spek, A.L. (1994). Am. Crystallogr. Assoc.-Abstracts, 22, 66.

;


_publ_section_figure_captions       
;
     Fig. 1. Chemical structural diagram (scheme 1) of the title compound

     Fig. 2. Perspective PLUTO drawing of the molecule illustrating the
             configuration and the adopted numbering scheme.

     Fig. 3. Molecular packing viewed down unit cell axes.

     Fig. 4. Perspective ORTEP drawing of the title compound. 
             All non-hydrogen atoms are represented by thermal vibrational
             ellipsoids drawn to encompass 50% of the electron density.
             The hydrogen atoms are drawn with an arbitrary radius.
;

#===============================================================================

data_c22h55n4

#===============================================================================

# 5. CHEMICAL DATA

_chemical_name_systematic           
;
 ?
;
_chemical_name_common                ?
_chemical_melting_point              ?
_chemical_formula_moiety            
'C22 H55 N4 Si2 Y'
_chemical_formula_structural         ?
# Ex: 'C12 H16 N2 O6, H2 O' and '(Cd 2+)3, (C6 N6 Cr 3-)2, 2(H2 O)' 
_chemical_formula_sum               
'C22 H55 N4 Si2 Y'
_chemical_formula_weight                520.79
_chemical_compound_source           'see text'

loop_
_atom_type_symbol                   
_atom_type_description              
_atom_type_scat_dispersion_real     
_atom_type_scat_dispersion_imag     
_atom_type_scat_source              
 Y   Y   -2.7962    3.5667
 'International Tables Vol C Tables 4.2.6.8 and 6.1.1.4'
Si  Si    0.0817    0.0704
 'International Tables Vol C Tables 4.2.6.8 and 6.1.1.4'
 N   N    0.0061    0.0033
 'International Tables Vol C Tables 4.2.6.8 and 6.1.1.4'
 H   H    0.0000    0.0000
 'International Tables Vol C Tables 4.2.6.8 and 6.1.1.4'
 C   C    0.0033    0.0016
 'International Tables Vol C Tables 4.2.6.8 and 6.1.1.4'

#===============================================================================

# 6. CRYSTAL DATA

_symmetry_cell_setting                  Triclinic
_symmetry_space_group_name_Hall      '-P 1'
_symmetry_space_group_name_H-M       'P -1'

loop_
_symmetry_equiv_pos_as_xyz          
 x,y,z                         
 -x,-y,-z                      

_cell_length_a                           9.5799(4)
_cell_length_b                           9.8987(5)
_cell_length_c                          17.4468(8)
_cell_angle_alpha                      99.185(1)
_cell_angle_beta                       98.943(1)
_cell_angle_gamma                     111.086(1)
_cell_volume                           1482.62(12)
_cell_formula_units_Z                 2
_cell_measurement_temperature        90   
_cell_measurement_reflns_used      7010
_cell_measurement_theta_min        2.27
_cell_measurement_theta_max       27.48
_cell_special_details
;
 The final unit cell was obtained from the xyz centroids of 
   7010 reflections after integration using the SAINT software
  package (Bruker, 2000). 

 The intensity data were corrected for decay and absorption 
   using SADABS (Sheldrick, 2000).
;
_exptl_crystal_description        '  block'
_exptl_crystal_colour             '  colorless'
_exptl_crystal_size_max           0.500 
_exptl_crystal_size_mid           0.320 
_exptl_crystal_size_min           0.220 
_exptl_crystal_size_rad           ? 
_exptl_crystal_density_meas       ? 
_exptl_crystal_density_diffrn     1.167 
_exptl_crystal_density_method     'Not Measured' 
_exptl_crystal_F_000              564 
_exptl_absorpt_coefficient_mu     2.062 
_exptl_absorpt_correction_type    'Semi-empirical'            
_exptl_absorpt_process_detais     '(SADABS (Sheldrick, Bruker, 2000))'
_exptl_absorpt_correction_T_min   0.7043
_exptl_absorpt_correction_T_max   1.0000
 

#===============================================================================

# 7. EXPERIMENTAL DATA

_exptl_special_details 
; 
 ? 
; 
 
_diffrn_ambient_temperature       90(2) 
_diffrn_radiation_wavelength      0.71073 
_diffrn_radiation_type            MoK\a 
_diffrn_radiation_source             'fine focus sealed Siemens Mo tube '
_diffrn_radiation_monochromator      'parallel mounted graphite'
_diffrn_radiation_detector          
;
  CCD area-detector
;
_diffrn_measurement_device_type     
;
  Bruker Smart Apex 
;

_diffrn_measurement_method           '\w/2\q'

_diffrn_special_details             
;
 Crystal into the cold nitrogen stream of the low-temparature
  unit (KROFLEX, (Bruker, 2000)).
;
_diffrn_detector_area_resol_mean     ?

_diffrn_standards_number             ?
_diffrn_standards_interval_count     ?
_diffrn_standards_interval_time      ?
_diffrn_standards_decay_%            'negligible' 

loop_
_diffrn_standard_refln_index_h      
_diffrn_standard_refln_index_k      
_diffrn_standard_refln_index_l      
 ? ? ?

# number of measured reflections (redundant set)
_diffrn_reflns_number             12916 
_diffrn_reflns_av_R_equivalents   0.0229 
_diffrn_reflns_av_sigmaI/netI     0.0497 
_diffrn_reflns_limit_h_min        -12 
_diffrn_reflns_limit_h_max        10 
_diffrn_reflns_limit_k_min        -12 
_diffrn_reflns_limit_k_max        12 
_diffrn_reflns_limit_l_min        -22 
_diffrn_reflns_limit_l_max        22 
_diffrn_reflns_theta_min          2.27 
_diffrn_reflns_theta_max          27.49 
_diffrn_measured_fraction_theta_max    0.978 
_diffrn_reflns_theta_full              27.49 
_diffrn_measured_fraction_theta_full   0.978 

_diffrn_reflns_reduction_process    
;
 Intensity data were corrected for Lorentz and polarization
  effects, decay and absorption and reduced to F~o~^2^
  using SAINT (Bruker, 2000) and SABABS (Sheldrick, 2000)
;

# number of unique reflections
_reflns_number_total              6650 
_reflns_number_gt                 5549 
_reflns_threshold_expression      >2sigma(I) 
 

_computing_data_collection          'SMART, Bruker Version 5.168, 2000'
_computing_cell_refinement          'SAINT, Bruker Version 6.02A, 2000'
_computing_data_reduction           'XPREP, Bruker Version 5.1/NT, 2000'
_computing_structure_solution       
;
 DIRDIF-99 (Beurskens et al., 1999)
;
_computing_structure_refinement      'SHELXL-97 (Sheldrick, 1997)'
_computing_molecular_graphics       
;
 PLUTO (Meetsma, 2000) 
 PLATON (Spek, 1994, 1996)
;
_computing_publication_material     
;
 PLATON (Spek, 1990)
 SHELXL (Sheldrick, 1997)
;

#===============================================================================

# 8. REFINEMENT DATA

 
_refine_special_details 
; 
 Refinement of F^2^ against ALL reflections.  The weighted R-factor wR and 
 goodness of fit S are based on F^2^, conventional R-factors R are based 
 on F, with F set to zero for negative F^2^. The threshold expression of 
 F^2^ > 2sigma(F^2^) is used only for calculating R-factors(gt) etc. and is 
 not relevant to the choice of reflections for refinement.  R-factors based 
 on F^2^ are statistically about twice as large as those based on F, and R- 
 factors based on ALL data will be even larger. 
; 
 
_refine_ls_structure_factor_coef  Fsqd  
_refine_ls_matrix_type            full 
_refine_ls_weighting_details      calc 
_refine_ls_weighting_scheme 
 'calc w=1/[\s^2^(Fo^2^)+(0.0267P)^2^+0.0000P] where P=(Fo^2^+2Fc^2^)/3' 
_atom_sites_solution_primary      Patterson
_atom_sites_solution_secondary    direct 
_atom_sites_solution_hydrogens    difmap
_refine_ls_hydrogen_treatment     refall
_refine_ls_extinction_method      none 
_refine_ls_extinction_coef        ? 
_refine_ls_abs_structure_details  ? 
_refine_ls_abs_structure_Flack    ? 
_refine_ls_number_reflns          6650 
_refine_ls_number_parameters      482 
_refine_ls_number_restraints      0 
_refine_ls_number_constraints     ? 
_refine_ls_R_factor_all           0.0358 
_refine_ls_R_factor_gt            0.0277 
_refine_ls_wR_factor_ref          0.0581 
_refine_ls_wR_factor_gt           0.0569 
_refine_ls_goodness_of_fit_ref    0.936 
_refine_ls_restrained_S_all       0.936 
_refine_ls_shift/su_max           0.001 
_refine_ls_shift/su_mean          0.000 
 
_refine_diff_density_max          0.618 
_refine_diff_density_min         -0.343 
_refine_diff_density_rms          0.058 

#===============================================================================

# 9. ATOMIC COORDINATES AND THERMAL PARAMETERS

loop_
_atom_site_label                    
_atom_site_type_symbol              
_atom_site_thermal_displace_type    
_atom_site_fract_x                  
_atom_site_fract_y                  
_atom_site_fract_z                  
_atom_site_occupancy                
_atom_site_U_iso_or_equiv           
 Y1     Y  Uani    0.02229(2)   0.18448(2)   0.24513(1)     1.000    0.0142(1)  
 Si1    Si Uani    0.29086(6)   0.20740(5)   0.45428(3)     1.000    0.0182(2)  
 Si2    Si Uani    0.33577(6)   0.46544(5)   0.16585(3)     1.000    0.0181(2)  
 N1     N  Uani  -0.02597(17) -0.05762(15)   0.22290(8)     1.000    0.0159(4)  
 N2     N  Uani  -0.23447(16)  0.05542(15)   0.27746(8)     1.000    0.0159(4)  
 N3     N  Uani  -0.23865(17)  0.11632(16)   0.11750(8)     1.000    0.0181(4)  
 N4     N  Uani  -0.05065(17)  0.37560(15)   0.33123(8)     1.000    0.0173(4)  
 C1     C  Uani     0.1495(3)   -0.0347(2)  0.13647(13)     1.000    0.0270(7)  
 C2     C  Uani    -0.0580(3)   -0.2837(2)  0.12074(13)     1.000    0.0283(7)  
 C3     C  Uani     0.1637(3)   -0.1766(2)  0.23897(12)     1.000    0.0246(6)  
 C4     C  Uani     0.0528(2) -0.13908(19)  0.18111(10)     1.000    0.0203(6)  
 C5     C  Uani    -0.1286(2)   -0.1442(2)  0.26622(11)     1.000    0.0186(5)  
 C6     C  Uani    -0.1841(2)   -0.0458(2)  0.31947(11)     1.000    0.0182(5)  
 C7     C  Uani    -0.3647(2)   -0.0312(2)  0.20806(11)     1.000    0.0198(6)  
 C8     C  Uani    -0.3787(2)    0.0599(2)  0.14807(11)     1.000    0.0198(6)  
 C9     C  Uani    -0.2322(3)   -0.0062(2)  0.05952(11)     1.000    0.0241(6)  
 C10    C  Uani    -0.2479(3)    0.2296(2)  0.07371(12)     1.000    0.0235(6)  
 C11    C  Uani    -0.2780(2)    0.1533(2)  0.33384(11)     1.000    0.0191(6)  
 C12    C  Uani    -0.1401(2)    0.2911(2)  0.38223(11)     1.000    0.0195(6)  
 C13    C  Uani    -0.1414(3)    0.4393(2)  0.28404(12)     1.000    0.0226(6)  
 C14    C  Uani     0.0873(3)    0.5015(2)  0.38247(12)     1.000    0.0242(6)  
 C15    C  Uani     0.2446(2)    0.2484(2)  0.35659(11)     1.000    0.0197(6)  
 C16    C  Uani     0.2024(3)    0.0040(2)  0.45301(13)     1.000    0.0298(7)  
 C17    C  Uani     0.5024(3)    0.2659(3)  0.49607(13)     1.000    0.0317(7)  
 C18    C  Uani     0.2265(3)    0.3076(3)  0.53372(12)     1.000    0.0255(7)  
 C19    C  Uani     0.1357(2)    0.3445(2)  0.15851(11)     1.000    0.0188(6)  
 C20    C  Uani     0.4563(3)    0.3544(3)  0.15503(17)     1.000    0.0364(8)  
 C21    C  Uani     0.3633(3)    0.5785(3)  0.08795(13)     1.000    0.0304(7)  
 C22    C  Uani     0.4278(3)    0.6004(2)  0.26548(12)     1.000    0.0244(6)  
 H1     H  Uiso      0.089(2)    -0.010(2)   0.0985(12)     1.000     0.033(6)  
 H1'    H  Uiso      0.224(2)     0.050(2)   0.1732(12)     1.000     0.033(6)  
 H1"    H  Uiso      0.208(2)    -0.078(2)   0.1098(12)     1.000     0.034(6)  
 H2     H  Uiso     -0.121(2)    -0.263(2)   0.0806(12)     1.000     0.035(6)  
 H2'    H  Uiso     -0.124(2)    -0.356(2)   0.1452(11)     1.000     0.025(5)  
 H2"    H  Uiso      0.000(2)    -0.332(2)   0.0942(12)     1.000     0.031(6)  
 H3     H  Uiso      0.244(2)    -0.087(2)   0.2739(12)     1.000     0.032(6)  
 H3'    H  Uiso      0.112(2)    -0.239(2)   0.2712(12)     1.000     0.034(6)  
 H3"    H  Uiso      0.215(2)    -0.225(2)   0.2109(12)     1.000     0.033(6)  
 H5     H  Uiso     -0.218(2)  -0.2273(19)   0.2300(10)     1.000     0.014(4)  
 H5'    H  Uiso     -0.081(2)  -0.1882(19)   0.3028(10)     1.000     0.015(5)  
 H6     H  Uiso     -0.272(2)  -0.1070(18)    0.3377(9)     1.000     0.009(4)  
 H6'    H  Uiso     -0.102(2)   0.0201(19)   0.3663(10)     1.000     0.015(4)  
 H7     H  Uiso   -0.3481(19)  -0.1138(19)   0.1834(10)     1.000     0.010(4)  
 H7'    H  Uiso     -0.460(2)  -0.0667(19)   0.2273(10)     1.000     0.015(5)  
 H8     H  Uiso   -0.3974(19)   0.1440(19)   0.1712(10)     1.000     0.015(5)  
 H8'    H  Uiso     -0.469(2)   0.0016(19)   0.1051(10)     1.000     0.015(5)  
 H9     H  Uiso     -0.227(2)    -0.081(2)   0.0843(11)     1.000     0.025(5)  
 H9'    H  Uiso     -0.135(2)   0.0331(19)   0.0398(10)     1.000     0.017(5)  
 H9"    H  Uiso     -0.323(2)    -0.053(2)   0.0147(11)     1.000     0.026(5)  
 H10    H  Uiso     -0.339(2)     0.193(2)   0.0314(12)     1.000     0.027(5)  
 H10'   H  Uiso     -0.165(2)     0.267(2)   0.0521(11)     1.000     0.026(6)  
 H10"   H  Uiso     -0.244(2)     0.313(2)   0.1089(12)     1.000     0.028(5)  
 H11    H  Uiso     -0.357(2)   0.1773(19)   0.3047(10)     1.000     0.016(5)  
 H11'   H  Uiso     -0.331(2)     0.099(2)   0.3686(11)     1.000     0.021(5)  
 H12    H  Uiso     -0.071(2)   0.2663(19)   0.4167(10)     1.000     0.016(5)  
 H12'   H  Uiso     -0.172(2)     0.355(2)   0.4168(11)     1.000     0.024(5)  
 H13    H  Uiso     -0.082(2)   0.4913(19)   0.2547(10)     1.000     0.017(5)  
 H13'   H  Uiso     -0.231(2)     0.365(2)   0.2481(11)     1.000     0.023(5)  
 H13"   H  Uiso     -0.176(2)     0.504(2)   0.3187(11)     1.000     0.026(5)  
 H14    H  Uiso      0.145(2)     0.465(2)   0.4159(12)     1.000     0.028(6)  
 H14'   H  Uiso      0.150(2)     0.554(2)   0.3501(11)     1.000     0.023(5)  
 H14"   H  Uiso      0.060(2)     0.572(2)   0.4156(11)     1.000     0.026(5)  
 H15    H  Uiso      0.300(2)     0.354(2)   0.3622(12)     1.000     0.037(6)  
 H15'   H  Uiso      0.287(2)     0.199(2)   0.3229(12)     1.000     0.040(6)  
 H16    H  Uiso      0.227(3)    -0.013(2)   0.5016(14)     1.000     0.045(7)  
 H16'   H  Uiso      0.237(3)    -0.052(3)   0.4183(14)     1.000     0.050(7)  
 H16"   H  Uiso      0.098(3)    -0.034(3)   0.4384(15)     1.000     0.062(9)  
 H17    H  Uiso      0.526(2)     0.238(2)   0.5438(13)     1.000     0.040(6)  
 H17'   H  Uiso      0.560(3)     0.367(3)   0.5026(15)     1.000     0.065(9)  
 H17"   H  Uiso      0.542(3)     0.224(3)   0.4621(16)     1.000     0.069(9)  
 H18    H  Uiso      0.264(2)     0.295(2)   0.5851(12)     1.000     0.032(6)  
 H18'   H  Uiso      0.115(3)     0.266(2)   0.5242(12)     1.000     0.040(6)  
 H18"   H  Uiso      0.261(2)     0.406(2)   0.5333(12)     1.000     0.041(7)  
 H19    H  Uiso      0.099(2)     0.284(2)   0.1063(11)     1.000     0.024(5)  
 H19'   H  Uiso      0.079(2)     0.403(2)   0.1567(12)     1.000     0.034(6)  
 H20    H  Uiso      0.417(3)     0.284(3)   0.1083(14)     1.000     0.047(7)  
 H20'   H  Uiso      0.551(3)     0.415(3)   0.1566(14)     1.000     0.056(8)  
 H20"   H  Uiso      0.464(2)     0.304(2)   0.2023(14)     1.000     0.044(7)  
 H21    H  Uiso      0.465(3)     0.633(2)   0.0896(12)     1.000     0.035(6)  
 H21'   H  Uiso      0.322(2)     0.520(2)   0.0393(13)     1.000     0.033(6)  
 H21"   H  Uiso      0.309(2)     0.643(2)   0.0932(12)     1.000     0.037(6)  
 H22    H  Uiso      0.532(3)     0.662(2)   0.2674(12)     1.000     0.036(6)  
 H22'   H  Uiso      0.426(2)     0.552(2)   0.3066(12)     1.000     0.033(6)  
 H22"   H  Uiso      0.375(2)     0.666(2)   0.2788(12)     1.000     0.041(6)  

loop_
_atom_site_aniso_label              
_atom_site_aniso_U_11               
_atom_site_aniso_U_22               
_atom_site_aniso_U_33               
_atom_site_aniso_U_23               
_atom_site_aniso_U_13               
_atom_site_aniso_U_12               
  Y1       0.0162(1)  0.0133(1)  0.0137(1)   0.0043(1)   0.0052(1)   0.0054(1)  
  Si1      0.0193(3)  0.0198(3)  0.0155(2)   0.0052(2)   0.0040(2)   0.0073(2)  
  Si2      0.0170(3)  0.0173(3)  0.0206(3)   0.0064(2)   0.0062(2)   0.0057(2)  
  N1       0.0194(8)  0.0136(7)  0.0166(7)   0.0048(6)   0.0080(6)   0.0065(6)  
  N2       0.0191(8)  0.0155(7)  0.0146(7)   0.0047(6)   0.0046(6)   0.0076(6)  
  N3       0.0184(8)  0.0198(8)  0.0164(7)   0.0054(6)   0.0044(6)   0.0071(7)  
  N4       0.0193(8)  0.0154(7)  0.0166(7)   0.0039(6)   0.0045(6)   0.0058(7)  
  C1      0.0347(13) 0.0298(12) 0.0272(11)   0.0096(9)  0.0173(10)  0.0195(11)  
  C2      0.0378(14) 0.0224(11) 0.0253(11)   0.0004(9)  0.0055(10)  0.0154(10)  
  C3      0.0288(12) 0.0251(11) 0.0259(10)   0.0074(9)   0.0106(9)  0.0150(10)  
  C4      0.0280(11)  0.0175(9)  0.0185(9)   0.0034(7)   0.0079(8)   0.0117(8)  
  C5      0.0201(10)  0.0159(9)  0.0198(9)   0.0056(8)   0.0054(8)   0.0061(8)  
  C6      0.0190(10)  0.0194(9)  0.0174(9)   0.0072(8)   0.0066(8)   0.0069(8)  
  C7      0.0162(10) 0.0187(10) 0.0210(10)   0.0039(8)   0.0034(8)   0.0035(8)  
  C8      0.0161(10) 0.0210(10)  0.0200(9)   0.0038(8)   0.0020(8)   0.0059(8)  
  C9      0.0299(12) 0.0269(11)  0.0157(9)   0.0037(8)   0.0037(9)  0.0125(10)  
  C10     0.0219(12) 0.0274(11) 0.0216(10)   0.0100(9)   0.0033(9)   0.0091(9)  
  C11     0.0204(11) 0.0220(10)  0.0191(9)   0.0075(8)   0.0103(8)   0.0098(8)  
  C12     0.0249(11) 0.0221(10)  0.0158(9)   0.0044(8)   0.0072(8)   0.0131(9)  
  C13     0.0268(12) 0.0188(10) 0.0230(10)   0.0068(9)   0.0047(9)   0.0095(9)  
  C14     0.0264(12) 0.0186(10) 0.0245(10)   0.0017(8)   0.0022(9)   0.0082(9)  
  C15     0.0210(11) 0.0182(10)  0.0188(9)   0.0053(8)   0.0058(8)   0.0055(8)  
  C16     0.0411(15) 0.0242(11) 0.0205(11)   0.0069(9)  0.0013(10)  0.0105(11)  
  C17     0.0251(12) 0.0491(15) 0.0227(11)  0.0091(10)   0.0045(9)  0.0167(12)  
  C18     0.0314(13) 0.0314(12) 0.0190(10)   0.0104(9)   0.0080(9)  0.0158(10)  
  C19     0.0191(10)  0.0190(9) 0.0200(10)   0.0071(8)   0.0058(8)   0.0080(8)  
  C20     0.0244(13) 0.0285(12) 0.0560(16)  0.0051(12)  0.0132(12)  0.0106(11)  
  C21     0.0328(14) 0.0282(12) 0.0218(11)   0.0075(9)  0.0079(10)  0.0011(11)  
  C22     0.0240(12) 0.0232(10) 0.0218(10)   0.0091(9)   0.0042(9)   0.0032(9)  

#===============================================================================

# 10. MOLECULAR GEOMETRY

_geom_special_details               
;
 Bond distances, angles etc. have been calculated using the
 rounded fractional coordinates. All esds are estimated
 from the variances of the (full) variance-covariance matrix.
 The cell esds are taken into account in the estimation of
 distances, angles and torsion angles
;

loop_
_geom_bond_atom_site_label_1        
_geom_bond_atom_site_label_2        
_geom_bond_distance                 
_geom_bond_site_symmetry_1          
_geom_bond_site_symmetry_2          
_geom_bond_publ_flag                
 Y1      N1       2.2266(15)                     .       .                   yes
 Y1      N2       2.5300(16)                     .       .                   yes
 Y1      N4       2.5873(15)                     .       .                   yes
 Y1      C15        2.463(2)                     .       .                   yes
 Y1      C19      2.4515(19)                     .       .                   yes
 Si1     C15      1.8389(19)                     .       .                   yes
 Si1     C16        1.877(2)                     .       .                   yes
 Si1     C17        1.880(3)                     .       .                   yes
 Si1     C18        1.885(3)                     .       .                   yes
 Si2     C19        1.829(2)                     .       .                   yes
 Si2     C20        1.869(3)                     .       .                   yes
 Si2     C21        1.885(3)                     .       .                   yes
 Si2     C22        1.876(2)                     .       .                   yes
 N1      C4         1.474(3)                     .       .                   yes
 N1      C5         1.450(2)                     .       .                   yes
 N2      C6         1.499(2)                     .       .                   yes
 N2      C7         1.479(2)                     .       .                   yes
 N2      C11        1.481(2)                     .       .                   yes
 N3      C8         1.475(3)                     .       .                   yes
 N3      C9         1.476(3)                     .       .                   yes
 N3      C10        1.474(3)                     .       .                   yes
 N4      C12        1.478(2)                     .       .                   yes
 N4      C13        1.473(3)                     .       .                   yes
 N4      C14        1.480(3)                     .       .                   yes
 C1      C4         1.525(3)                     .       .                   no 
 C2      C4         1.537(3)                     .       .                   no 
 C3      C4         1.535(3)                     .       .                   no 
 C5      C6         1.527(3)                     .       .                   no 
 C7      C8         1.507(3)                     .       .                   no 
 C11     C12        1.519(3)                     .       .                   no 
 C1      H1          0.93(2)                     .       .                   no 
 C1      H1'         0.94(2)                     .       .                   no 
 C1      H1"         0.95(2)                     .       .                   no 
 C2      H2          0.95(2)                     .       .                   no 
 C2      H2'       0.975(19)                     .       .                   no 
 C2      H2"         0.98(2)                     .       .                   no 
 C3      H3          0.97(2)                     .       .                   no 
 C3      H3'         0.96(2)                     .       .                   no 
 C3      H3"         0.94(2)                     .       .                   no 
 C5      H5        0.984(18)                     .       .                   no 
 C5      H5'       0.973(18)                     .       .                   no 
 C6      H6        0.977(19)                     .       .                   no 
 C6      H6'       0.986(18)                     .       .                   no 
 C7      H7        0.939(18)                     .       .                   no 
 C7      H7'         0.99(2)                     .       .                   no 
 C8      H8        0.954(18)                     .       .                   no 
 C8      H8'       0.972(18)                     .       .                   no 
 C9      H9        0.927(19)                     .       .                   no 
 C9      H9'         1.01(2)                     .       .                   no 
 C9      H9"       0.983(19)                     .       .                   no 
 C10     H10         0.96(2)                     .       .                   no 
 C10     H10'        0.91(2)                     .       .                   no 
 C10     H10"        0.93(2)                     .       .                   no 
 C11     H11       0.967(19)                     .       .                   no 
 C11     H11'      0.958(19)                     .       .                   no 
 C12     H12       0.949(19)                     .       .                   no 
 C12     H12'        0.97(2)                     .       .                   no 
 C13     H13       0.903(18)                     .       .                   no 
 C13     H13'      0.950(19)                     .       .                   no 
 C13     H13"        0.99(2)                     .       .                   no 
 C14     H14         0.94(2)                     .       .                   no 
 C14     H14'      0.961(19)                     .       .                   no 
 C14     H14"        0.97(2)                     .       .                   no 
 C15     H15       0.967(19)                     .       .                   no 
 C15     H15'        0.94(2)                     .       .                   no 
 C16     H16         0.90(2)                     .       .                   no 
 C16     H16'        0.93(3)                     .       .                   no 
 C16     H16"        0.91(3)                     .       .                   no 
 C17     H17         0.94(2)                     .       .                   no 
 C17     H17'        0.93(3)                     .       .                   no 
 C17     H17"        0.88(3)                     .       .                   no 
 C18     H18         0.96(2)                     .       .                   no 
 C18     H18'        0.97(3)                     .       .                   no 
 C18     H18"      0.911(19)                     .       .                   no 
 C19     H19       0.942(19)                     .       .                   no 
 C19     H19'        0.93(2)                     .       .                   no 
 C20     H20         0.91(2)                     .       .                   no 
 C20     H20'        0.88(3)                     .       .                   no 
 C20     H20"        1.04(2)                     .       .                   no 
 C21     H21         0.92(3)                     .       .                   no 
 C21     H21'        0.89(2)                     .       .                   no 
 C21     H21"        0.96(2)                     .       .                   no 
 C22     H22         0.96(3)                     .       .                   no 
 C22     H22'        0.92(2)                     .       .                   no 
 C22     H22"        0.98(2)                     .       .                   no 

loop_
_geom_angle_atom_site_label_1       
_geom_angle_atom_site_label_2       
_geom_angle_atom_site_label_3       
_geom_angle                         
_geom_angle_site_symmetry_1         
_geom_angle_site_symmetry_2         
_geom_angle_site_symmetry_3         
_geom_angle_publ_flag               
 N1      Y1      N2         72.69(5)             .       .       .           yes
 N1      Y1      N4        138.63(5)             .       .       .           yes
 N1      Y1      C15        92.74(6)             .       .       .           yes
 N1      Y1      C19       123.78(6)             .       .       .           yes
 N2      Y1      N4         69.67(5)             .       .       .           yes
 N2      Y1      C15       113.80(6)             .       .       .           yes
 N2      Y1      C19       140.29(6)             .       .       .           yes
 N4      Y1      C15        87.17(6)             .       .       .           yes
 N4      Y1      C19        96.47(6)             .       .       .           yes
 C15     Y1      C19       101.96(6)             .       .       .           yes
 C15     Si1     C16       113.44(9)             .       .       .           yes
 C15     Si1     C17      114.10(10)             .       .       .           yes
 C15     Si1     C18      112.50(10)             .       .       .           yes
 C16     Si1     C17      105.03(13)             .       .       .           yes
 C16     Si1     C18      106.76(12)             .       .       .           yes
 C17     Si1     C18      104.21(12)             .       .       .           yes
 C19     Si2     C20      111.01(11)             .       .       .           yes
 C19     Si2     C21      114.36(11)             .       .       .           yes
 C19     Si2     C22      112.55(11)             .       .       .           yes
 C20     Si2     C21      106.20(13)             .       .       .           yes
 C20     Si2     C22      105.32(13)             .       .       .           yes
 C21     Si2     C22      106.80(10)             .       .       .           yes
 Y1      N1      C4       128.59(11)             .       .       .           yes
 Y1      N1      C5       116.80(12)             .       .       .           yes
 C4      N1      C5       113.63(14)             .       .       .           yes
 Y1      N2      C6        94.83(11)             .       .       .           yes
 Y1      N2      C7       115.75(11)             .       .       .           yes
 Y1      N2      C11      114.17(11)             .       .       .           yes
 C6      N2      C7       110.93(14)             .       .       .           yes
 C6      N2      C11      109.80(13)             .       .       .           yes
 C7      N2      C11      110.33(15)             .       .       .           yes
 C8      N3      C9       109.34(16)             .       .       .           yes
 C8      N3      C10      108.98(17)             .       .       .           yes
 C9      N3      C10      106.82(14)             .       .       .           yes
 Y1      N4      C12      104.45(10)             .       .       .           yes
 Y1      N4      C13      113.59(11)             .       .       .           yes
 Y1      N4      C14      111.62(14)             .       .       .           yes
 C12     N4      C13      110.75(17)             .       .       .           yes
 C12     N4      C14      109.18(14)             .       .       .           yes
 C13     N4      C14      107.22(15)             .       .       .           yes
 N1      C4      C1       106.50(16)             .       .       .           yes
 N1      C4      C2       113.49(18)             .       .       .           yes
 N1      C4      C3       112.42(15)             .       .       .           yes
 C1      C4      C2       108.70(15)             .       .       .           no 
 C1      C4      C3       107.05(18)             .       .       .           no 
 C2      C4      C3       108.41(16)             .       .       .           no 
 N1      C5      C6       110.75(15)             .       .       .           yes
 N2      C6      C5       112.80(15)             .       .       .           yes
 N2      C7      C8       111.80(15)             .       .       .           yes
 N3      C8      C7       112.51(16)             .       .       .           yes
 N2      C11     C12      112.28(16)             .       .       .           yes
 N4      C12     C11      112.38(15)             .       .       .           yes
 Y1      C15     Si1      139.95(10)             .       .       .           yes
 Y1      C19     Si2      130.45(10)             .       .       .           yes
 C4      C1      H1        111.9(13)             .       .       .           no 
 C4      C1      H1'       109.5(12)             .       .       .           no 
 C4      C1      H1"       111.5(12)             .       .       .           no 
 H1      C1      H1'       111.9(17)             .       .       .           no 
 H1      C1      H1"       107.8(18)             .       .       .           no 
 H1'     C1      H1"       103.9(18)             .       .       .           no 
 C4      C2      H2        110.6(12)             .       .       .           no 
 C4      C2      H2'       113.2(11)             .       .       .           no 
 C4      C2      H2"       110.1(12)             .       .       .           no 
 H2      C2      H2'       108.6(17)             .       .       .           no 
 H2      C2      H2"       107.3(17)             .       .       .           no 
 H2'     C2      H2"       106.8(16)             .       .       .           no 
 C4      C3      H3        111.2(12)             .       .       .           no 
 C4      C3      H3'       112.3(13)             .       .       .           no 
 C4      C3      H3"       110.6(12)             .       .       .           no 
 H3      C3      H3'       108.6(17)             .       .       .           no 
 H3      C3      H3"       105.4(17)             .       .       .           no 
 H3'     C3      H3"       108.5(17)             .       .       .           no 
 N1      C5      H5        111.8(10)             .       .       .           no 
 N1      C5      H5'       114.2(12)             .       .       .           no 
 C6      C5      H5        109.4(12)             .       .       .           no 
 C6      C5      H5'       104.2(11)             .       .       .           no 
 H5      C5      H5'       106.1(15)             .       .       .           no 
 N2      C6      H6        107.0(11)             .       .       .           no 
 N2      C6      H6'       105.6(11)             .       .       .           no 
 C5      C6      H6        110.4(10)             .       .       .           no 
 C5      C6      H6'       111.7(12)             .       .       .           no 
 H6      C6      H6'       109.1(14)             .       .       .           no 
 N2      C7      H7        108.3(11)             .       .       .           no 
 N2      C7      H7'       108.6(10)             .       .       .           no 
 C8      C7      H7        108.9(11)             .       .       .           no 
 C8      C7      H7'       110.3(11)             .       .       .           no 
 H7      C7      H7'       108.9(16)             .       .       .           no 
 N3      C8      H8        107.4(11)             .       .       .           no 
 N3      C8      H8'       111.6(11)             .       .       .           no 
 C7      C8      H8        110.8(10)             .       .       .           no 
 C7      C8      H8'       109.5(11)             .       .       .           no 
 H8      C8      H8'       104.7(16)             .       .       .           no 
 N3      C9      H9        110.1(12)             .       .       .           no 
 N3      C9      H9'       108.7(10)             .       .       .           no 
 N3      C9      H9"       113.3(12)             .       .       .           no 
 H9      C9      H9'       107.2(17)             .       .       .           no 
 H9      C9      H9"       106.4(16)             .       .       .           no 
 H9'     C9      H9"       110.9(15)             .       .       .           no 
 N3      C10     H10       112.8(12)             .       .       .           no 
 N3      C10     H10'      113.0(12)             .       .       .           no 
 N3      C10     H10"      109.9(12)             .       .       .           no 
 H10     C10     H10'      107.7(17)             .       .       .           no 
 H10     C10     H10"      109.6(18)             .       .       .           no 
 H10'    C10     H10"      103.4(17)             .       .       .           no 
 N2      C11     H11       109.1(11)             .       .       .           no 
 N2      C11     H11'      110.3(12)             .       .       .           no 
 C12     C11     H11       112.6(11)             .       .       .           no 
 C12     C11     H11'      110.3(11)             .       .       .           no 
 H11     C11     H11'      101.8(17)             .       .       .           no 
 N4      C12     H12       106.6(12)             .       .       .           no 
 N4      C12     H12'      109.9(11)             .       .       .           no 
 C11     C12     H12       111.6(11)             .       .       .           no 
 C11     C12     H12'      110.7(12)             .       .       .           no 
 H12     C12     H12'      105.4(16)             .       .       .           no 
 N4      C13     H13       107.8(13)             .       .       .           no 
 N4      C13     H13'      112.5(12)             .       .       .           no 
 N4      C13     H13"      111.4(11)             .       .       .           no 
 H13     C13     H13'      107.5(16)             .       .       .           no 
 H13     C13     H13"      110.7(16)             .       .       .           no 
 H13'    C13     H13"      106.9(17)             .       .       .           no 
 N4      C14     H14       109.5(12)             .       .       .           no 
 N4      C14     H14'      110.2(11)             .       .       .           no 
 N4      C14     H14"      111.7(12)             .       .       .           no 
 H14     C14     H14'      109.2(17)             .       .       .           no 
 H14     C14     H14"      108.5(17)             .       .       .           no 
 H14'    C14     H14"      107.8(16)             .       .       .           no 
 Y1      C15     H15       102.9(12)             .       .       .           no 
 Y1      C15     H15'       89.4(13)             .       .       .           no 
 Si1     C15     H15       107.6(12)             .       .       .           no 
 Si1     C15     H15'      105.5(12)             .       .       .           no 
 H15     C15     H15'      107.0(17)             .       .       .           no 
 Si1     C16     H16       111.6(13)             .       .       .           no 
 Si1     C16     H16'      111.6(17)             .       .       .           no 
 Si1     C16     H16"      112.4(18)             .       .       .           no 
 H16     C16     H16'         106(2)             .       .       .           no 
 H16     C16     H16"         106(2)             .       .       .           no 
 H16'    C16     H16"         108(2)             .       .       .           no 
 Si1     C17     H17       114.3(13)             .       .       .           no 
 Si1     C17     H17'      114.0(19)             .       .       .           no 
 Si1     C17     H17"      110.1(19)             .       .       .           no 
 H17     C17     H17'         109(2)             .       .       .           no 
 H17     C17     H17"         106(2)             .       .       .           no 
 H17'    C17     H17"         103(3)             .       .       .           no 
 Si1     C18     H18       110.6(12)             .       .       .           no 
 Si1     C18     H18'      110.5(13)             .       .       .           no 
 Si1     C18     H18"      109.2(13)             .       .       .           no 
 H18     C18     H18'      106.4(17)             .       .       .           no 
 H18     C18     H18"      110.5(17)             .       .       .           no 
 H18'    C18     H18"      109.6(18)             .       .       .           no 
 Y1      C19     H19       106.0(12)             .       .       .           no 
 Y1      C19     H19'      102.3(12)             .       .       .           no 
 Si2     C19     H19       106.1(12)             .       .       .           no 
 Si2     C19     H19'      107.3(12)             .       .       .           no 
 H19     C19     H19'      101.1(18)             .       .       .           no 
 Si2     C20     H20       110.6(19)             .       .       .           no 
 Si2     C20     H20'      109.0(19)             .       .       .           no 
 Si2     C20     H20"      111.1(12)             .       .       .           no 
 H20     C20     H20'         110(2)             .       .       .           no 
 H20     C20     H20"         110(2)             .       .       .           no 
 H20'    C20     H20"         106(2)             .       .       .           no 
 Si2     C21     H21       113.6(13)             .       .       .           no 
 Si2     C21     H21'      110.8(13)             .       .       .           no 
 Si2     C21     H21"      109.7(12)             .       .       .           no 
 H21     C21     H21'      106.8(19)             .       .       .           no 
 H21     C21     H21"      110.2(19)             .       .       .           no 
 H21'    C21     H21"      105.5(18)             .       .       .           no 
 Si2     C22     H22       110.5(13)             .       .       .           no 
 Si2     C22     H22'      111.6(12)             .       .       .           no 
 Si2     C22     H22"      113.7(12)             .       .       .           no 
 H22     C22     H22'      109.0(18)             .       .       .           no 
 H22     C22     H22"      107.6(18)             .       .       .           no 
 H22'    C22     H22"      104.0(17)             .       .       .           no 

loop_
_geom_torsion_atom_site_label_1     
_geom_torsion_atom_site_label_2     
_geom_torsion_atom_site_label_3     
_geom_torsion_atom_site_label_4     
_geom_torsion                       
_geom_torsion_site_symmetry_1       
_geom_torsion_site_symmetry_2       
_geom_torsion_site_symmetry_3       
_geom_torsion_site_symmetry_4       
_geom_torsion_publ_flag             
 N2      Y1      N1      C4       167.52(15)     .       .       .       .   no 
 N2      Y1      N1      C5       -24.59(12)     .       .       .       .   no 
 N4      Y1      N1      C4      -167.22(12)     .       .       .       .   no 
 N4      Y1      N1      C5         0.67(17)     .       .       .       .   no 
 C15     Y1      N1      C4       -78.38(14)     .       .       .       .   no 
 C15     Y1      N1      C5        89.50(13)     .       .       .       .   no 
 C19     Y1      N1      C4        27.97(17)     .       .       .       .   no 
 C19     Y1      N1      C5      -164.15(12)     .       .       .       .   no 
 N1      Y1      N2      C6         41.99(9)     .       .       .       .   no 
 N1      Y1      N2      C7       -74.03(12)     .       .       .       .   no 
 N1      Y1      N2      C11      156.22(12)     .       .       .       .   no 
 N4      Y1      N2      C6      -120.51(10)     .       .       .       .   no 
 N4      Y1      N2      C7       123.47(13)     .       .       .       .   no 
 N4      Y1      N2      C11       -6.28(11)     .       .       .       .   no 
 C15     Y1      N2      C6       -43.27(11)     .       .       .       .   no 
 C15     Y1      N2      C7      -159.29(12)     .       .       .       .   no 
 C15     Y1      N2      C11       70.96(13)     .       .       .       .   no 
 C19     Y1      N2      C6       164.43(10)     .       .       .       .   no 
 C19     Y1      N2      C7        48.41(15)     .       .       .       .   no 
 C19     Y1      N2      C11      -81.34(14)     .       .       .       .   no 
 N1      Y1      N4      C12        5.85(15)     .       .       .       .   no 
 N1      Y1      N4      C13     -114.93(14)     .       .       .       .   no 
 N1      Y1      N4      C14      123.70(12)     .       .       .       .   no 
 N2      Y1      N4      C12       31.60(11)     .       .       .       .   no 
 N2      Y1      N4      C13      -89.18(14)     .       .       .       .   no 
 N2      Y1      N4      C14      149.45(12)     .       .       .       .   no 
 C15     Y1      N4      C12      -85.09(11)     .       .       .       .   no 
 C15     Y1      N4      C13      154.13(14)     .       .       .       .   no 
 C15     Y1      N4      C14       32.76(12)     .       .       .       .   no 
 C19     Y1      N4      C12      173.19(11)     .       .       .       .   no 
 C19     Y1      N4      C13       52.41(14)     .       .       .       .   no 
 C19     Y1      N4      C14      -68.96(12)     .       .       .       .   no 
 N1      Y1      C15     Si1      -59.21(16)     .       .       .       .   no 
 N2      Y1      C15     Si1       13.07(17)     .       .       .       .   no 
 N4      Y1      C15     Si1       79.38(15)     .       .       .       .   no 
 C19     Y1      C15     Si1      175.40(15)     .       .       .       .   no 
 N1      Y1      C19     Si2      -95.25(13)     .       .       .       .   no 
 N2      Y1      C19     Si2       160.55(9)     .       .       .       .   no 
 N4      Y1      C19     Si2       94.79(13)     .       .       .       .   no 
 C15     Y1      C19     Si2        6.32(14)     .       .       .       .   no 
 C16     Si1     C15     Y1          45.8(2)     .       .       .       .   no 
 C17     Si1     C15     Y1       166.03(15)     .       .       .       .   no 
 C18     Si1     C15     Y1       -75.52(18)     .       .       .       .   no 
 C20     Si2     C19     Y1        64.33(16)     .       .       .       .   no 
 C21     Si2     C19     Y1      -175.54(12)     .       .       .       .   no 
 C22     Si2     C19     Y1       -53.43(15)     .       .       .       .   no 
 Y1      N1      C4      C1         -14.1(2)     .       .       .       .   no 
 Y1      N1      C4      C2      -133.68(14)     .       .       .       .   no 
 C5      N1      C4      C3         -65.4(2)     .       .       .       .   no 
 Y1      N1      C5      C6         0.38(18)     .       .       .       .   no 
 C4      N1      C5      C6       170.07(15)     .       .       .       .   no 
 C5      N1      C4      C2          58.1(2)     .       .       .       .   no 
 Y1      N1      C4      C3       102.83(16)     .       .       .       .   no 
 C5      N1      C4      C1       177.68(16)     .       .       .       .   no 
 Y1      N2      C6      C5       -58.87(15)     .       .       .       .   no 
 C11     N2      C7      C8        79.83(19)     .       .       .       .   no 
 Y1      N2      C11     C12      -20.34(18)     .       .       .       .   no 
 C6      N2      C11     C12       84.70(18)     .       .       .       .   no 
 C7      N2      C11     C12     -152.74(15)     .       .       .       .   no 
 Y1      N2      C7      C8       -51.74(18)     .       .       .       .   no 
 C7      N2      C6      C5          61.1(2)     .       .       .       .   no 
 C11     N2      C6      C5      -176.72(15)     .       .       .       .   no 
 C6      N2      C7      C8      -158.27(16)     .       .       .       .   no 
 C9      N3      C8      C7        75.92(19)     .       .       .       .   no 
 C10     N3      C8      C7      -167.66(15)     .       .       .       .   no 
 Y1      N4      C12     C11      -56.46(17)     .       .       .       .   no 
 C13     N4      C12     C11         66.2(2)     .       .       .       .   no 
 C14     N4      C12     C11     -175.97(17)     .       .       .       .   no 
 N1      C5      C6      N2          45.8(2)     .       .       .       .   no 
 N2      C7      C8      N3          58.8(2)     .       .       .       .   no 
 N2      C11     C12     N4          54.3(2)     .       .       .       .   no 

loop_
_geom_contact_atom_site_label_1     
_geom_contact_atom_site_label_2     
_geom_contact_distance              
_geom_contact_site_symmetry_1       
_geom_contact_site_symmetry_2       
_geom_contact_publ_flag             
 Y1      N3       2.8703(15)                     .       .                   no 
 Y1      C9         3.504(2)                     .       .                   no 
 Y1      C10        3.833(2)                     .       .                   no 
 Y1      H1          3.24(2)                     .       .                   no 
 Y1      H1'         3.03(2)                     .       .                   no 
 Y1      H8        3.880(19)                     .       .                   no 
 Y1      H9        3.396(19)                     .       .                   no 
 Y1      H9'       3.512(17)                     .       .                   no 
 Y1      H10'      3.909(19)                     .       .                   no 
 Y1      H10"        3.90(2)                     .       .                   no 
 Si1     H6'         3.50(2)                     .       .                   no 
 Si1     H14         3.42(2)                     .       .                   no 
 N1      C9         3.424(3)                     .       .                   no 
 N3      C19        3.366(3)                     .       .                   no 
 N3      Y1       2.8703(15)                     .       .                   no 
 N1      H9        2.768(19)                     .       .                   no 
 N1      H7        2.879(19)                     .       .                   no 
 C9      Y1         3.504(2)                     .       .                   no 
 C9      N1         3.424(3)                     .       .                   no 
 C10     C19        3.428(3)                     .       .                   no 
 C10     Y1         3.833(2)                     .       .                   no 
 C19     C10        3.428(3)                     .       .                   no 
 C19     N3         3.366(3)                     .       .                   no 
 C1      H9'       3.060(17)                     .     2_555                 no 
 C2      H9          3.08(2)                     .       .                   no 
 C2      H5        2.735(19)                     .       .                   no 
 C3      H16'        3.04(2)                     .       .                   no 
 C3      H22"        3.03(2)                     .     1_545                 no 
 C3      H5'         2.72(2)                     .       .                   no 
 C5      H7        2.500(19)                     .       .                   no 
 C5      H3'         2.78(2)                     .       .                   no 
 C5      H2'       2.745(19)                     .       .                   no 
 C6      H22         3.05(2)                     .     1_445                 no 
 C6      H12       2.990(18)                     .       .                   no 
 C6      H16"        3.09(3)                     .       .                   no 
 C7      H5        2.815(19)                     .       .                   no 
 C7      H9          2.77(2)                     .       .                   no 
 C8      H13'      2.940(19)                     .       .                   no 
 C8      H11       2.738(17)                     .       .                   no 
 C9      H1          3.06(2)                     .       .                   no 
 C9      H7        2.769(18)                     .       .                   no 
 C10     H13'      3.077(19)                     .       .                   no 
 C10     H19'        2.96(2)                     .       .                   no 
 C11     H13'      2.713(19)                     .       .                   no 
 C11     H8        2.864(17)                     .       .                   no 
 C12     H6'       2.812(19)                     .       .                   no 
 C13     H11       2.792(19)                     .       .                   no 
 C13     H10"        2.97(2)                     .       .                   no 
 C14     H15         2.93(2)                     .       .                   no 
 C15     H14         2.77(2)                     .       .                   no 
 C18     H14         2.94(2)                     .       .                   no 
 C18     H12       3.089(19)                     .       .                   no 
 C19     H10'        2.94(2)                     .       .                   no 
 C20     H8        2.923(19)                     .     1_655                 no 
 H1      Y1          3.24(2)                     .       .                   no 
 H1      C9          3.06(2)                     .       .                   no 
 H1      H2          2.52(3)                     .       .                   no 
 H1      H9'         2.44(3)                     .       .                   no 
 H1      H9'         2.51(3)                     .     2_555                 no 
 H1'     Y1          3.03(2)                     .       .                   no 
 H1'     H3          2.41(3)                     .       .                   no 
 H1"     H2"         2.52(3)                     .       .                   no 
 H1"     H3"         2.47(3)                     .       .                   no 
 H2      H1          2.52(3)                     .       .                   no 
 H2      H9          2.36(3)                     .       .                   no 
 H2'     C5        2.745(19)                     .       .                   no 
 H2'     H5          2.29(3)                     .       .                   no 
 H2"     H1"         2.52(3)                     .       .                   no 
 H2"     H3"         2.44(3)                     .       .                   no 
 H3      H1'         2.41(3)                     .       .                   no 
 H3      H16'        2.50(3)                     .       .                   no 
 H3'     C5          2.78(2)                     .       .                   no 
 H3'     H5'         2.21(3)                     .       .                   no 
 H3'     H13         2.59(3)                     .     1_545                 no 
 H3"     H1"         2.47(3)                     .       .                   no 
 H3"     H2"         2.44(3)                     .       .                   no 
 H3"     H22"        2.44(3)                     .     1_545                 no 
 H5      C2        2.735(19)                     .       .                   no 
 H5      C7        2.815(19)                     .       .                   no 
 H5      H2'         2.29(3)                     .       .                   no 
 H5      H7          2.11(3)                     .       .                   no 
 H5      H22         2.49(3)                     .     1_445                 no 
 H5'     C3          2.72(2)                     .       .                   no 
 H5'     H3'         2.21(3)                     .       .                   no 
 H5'     H16"        2.56(3)                     .       .                   no 
 H6      H11'        2.31(3)                     .       .                   no 
 H6      H22         2.36(3)                     .     1_445                 no 
 H6      H18         2.48(3)                     .     2_556                 no 
 H6'     Si1         3.50(2)                     .       .                   no 
 H6'     C12       2.812(19)                     .       .                   no 
 H6'     H11'        2.58(3)                     .       .                   no 
 H6'     H12         2.35(3)                     .       .                   no 
 H6'     H16"        2.40(4)                     .       .                   no 
 H7      N1        2.879(19)                     .       .                   no 
 H7      C5        2.500(19)                     .       .                   no 
 H7      C9        2.769(18)                     .       .                   no 
 H7      H5          2.11(3)                     .       .                   no 
 H7      H9          2.23(3)                     .       .                   no 
 H7      H21         2.59(3)                     .     1_445                 no 
 H7'     H11         2.34(2)                     .       .                   no 
 H7'     H11'        2.57(3)                     .       .                   no 
 H8      Y1        3.880(19)                     .       .                   no 
 H8      C11       2.864(17)                     .       .                   no 
 H8      C20       2.923(19)                     .     1_455                 no 
 H8      H10"        2.33(3)                     .       .                   no 
 H8      H11         2.25(2)                     .       .                   no 
 H8      H13'        2.24(3)                     .       .                   no 
 H8      H20"        2.46(3)                     .     1_455                 no 
 H8'     H9"         2.39(3)                     .       .                   no 
 H8'     H10         2.52(3)                     .       .                   no 
 H9      Y1        3.396(19)                     .       .                   no 
 H9      N1        2.768(19)                     .       .                   no 
 H9      C2          3.08(2)                     .       .                   no 
 H9      C7          2.77(2)                     .       .                   no 
 H9      H2          2.36(3)                     .       .                   no 
 H9      H7          2.23(3)                     .       .                   no 
 H9'     Y1        3.512(17)                     .       .                   no 
 H9'     H1          2.44(3)                     .       .                   no 
 H9'     H10'        2.41(3)                     .       .                   no 
 H9'     C1        3.060(17)                     .     2_555                 no 
 H9'     H1          2.51(3)                     .     2_555                 no 
 H9"     H8'         2.39(3)                     .       .                   no 
 H9"     H10         2.47(3)                     .       .                   no 
 H10     H8'         2.52(3)                     .       .                   no 
 H10     H9"         2.47(3)                     .       .                   no 
 H10'    Y1        3.909(19)                     .       .                   no 
 H10'    C19         2.94(2)                     .       .                   no 
 H10'    H9'         2.41(3)                     .       .                   no 
 H10'    H19         2.49(3)                     .       .                   no 
 H10'    H19'        2.50(3)                     .       .                   no 
 H10"    Y1          3.90(2)                     .       .                   no 
 H10"    C13         2.97(2)                     .       .                   no 
 H10"    H8          2.33(3)                     .       .                   no 
 H10"    H13'        2.37(3)                     .       .                   no 
 H11     C8        2.738(17)                     .       .                   no 
 H11     C13       2.792(19)                     .       .                   no 
 H11     H7'         2.34(2)                     .       .                   no 
 H11     H8          2.25(2)                     .       .                   no 
 H11     H13'        2.29(3)                     .       .                   no 
 H11'    H6          2.31(3)                     .       .                   no 
 H11'    H6'         2.58(3)                     .       .                   no 
 H11'    H7'         2.57(3)                     .       .                   no 
 H11'    H17"        2.59(4)                     .     1_455                 no 
 H12     C6        2.990(18)                     .       .                   no 
 H12     C18       3.089(19)                     .       .                   no 
 H12     H6'         2.35(3)                     .       .                   no 
 H12     H14         2.29(3)                     .       .                   no 
 H12     H18'        2.38(3)                     .       .                   no 
 H12'    H13"        2.44(3)                     .       .                   no 
 H12'    H14"        2.48(3)                     .       .                   no 
 H13     H3'         2.59(3)                     .     1_565                 no 
 H13     H14'        2.37(3)                     .       .                   no 
 H13'    C8        2.940(19)                     .       .                   no 
 H13'    C10       3.077(19)                     .       .                   no 
 H13'    C11       2.713(19)                     .       .                   no 
 H13'    H8          2.24(3)                     .       .                   no 
 H13'    H10"        2.37(3)                     .       .                   no 
 H13'    H11         2.29(3)                     .       .                   no 
 H13"    H12'        2.44(3)                     .       .                   no 
 H13"    H14"        2.40(3)                     .       .                   no 
 H14     Si1         3.42(2)                     .       .                   no 
 H14     C15         2.77(2)                     .       .                   no 
 H14     C18         2.94(2)                     .       .                   no 
 H14     H12         2.29(3)                     .       .                   no 
 H14     H15         2.36(3)                     .       .                   no 
 H14     H18"        2.43(3)                     .       .                   no 
 H14'    H13         2.37(3)                     .       .                   no 
 H14"    H12'        2.48(3)                     .       .                   no 
 H14"    H13"        2.40(3)                     .       .                   no 
 H15     C14         2.93(2)                     .       .                   no 
 H15     H14         2.36(3)                     .       .                   no 
 H15     H22'        2.35(3)                     .       .                   no 
 H16'    C3          3.04(2)                     .       .                   no 
 H16'    H3          2.50(3)                     .       .                   no 
 H16"    C6          3.09(3)                     .       .                   no 
 H16"    H5'         2.56(3)                     .       .                   no 
 H16"    H6'         2.40(4)                     .       .                   no 
 H17'    H18"        2.53(3)                     .     2_666                 no 
 H17"    H11'        2.59(4)                     .     1_655                 no 
 H18     H6          2.48(3)                     .     2_556                 no 
 H18'    H12         2.38(3)                     .       .                   no 
 H18"    H14         2.43(3)                     .       .                   no 
 H18"    H17'        2.53(3)                     .     2_666                 no 
 H19     H10'        2.49(3)                     .       .                   no 
 H19'    C10         2.96(2)                     .       .                   no 
 H19'    H10'        2.50(3)                     .       .                   no 
 H20"    H8          2.46(3)                     .     1_655                 no 
 H21     H7          2.59(3)                     .     1_665                 no 
 H22     C6          3.05(2)                     .     1_665                 no 
 H22     H5          2.49(3)                     .     1_665                 no 
 H22     H6          2.36(3)                     .     1_665                 no 
 H22'    H15         2.35(3)                     .       .                   no 
 H22"    C3          3.03(2)                     .     1_565                 no 
 H22"    H3"         2.44(3)                     .     1_565                 no 

#===End of Crystallographic Information File
# CIF-file generated for  C23H48N5SiY (6)                   CP594    

#==============================================================================
data_global
#==============================================================================

# 0. AUDIT DETAILS

_audit_creation_date                 '2001-03-15  13:48:20'
_audit_creation_method               'PLATON <TABLE ACC> option' 
_audit_update_record                
;
 ?
;

#===============================================================================

# 1. SUBMISSION DETAILS

_publ_contact_author_name           # Name  of author for correspondence
;
   Drs. A. Meetsma
;
_publ_contact_author_address        # Address of author for correspondence
;
     Crystal Structure Center,
     Inorganic Solid State Chemistry Laboratory
     Chemical Physics,
     Materials Science Center,
     Groningen University,
     Nijenborgh 4,
     NL-9747 AG Groningen,
     The Netherlands.
;
_publ_contact_author_email           A.Meetsma@fwn.rug.nl
_publ_contact_author_fax             '+31 50 3634441'
_publ_contact_author_phone           '+31 50 3634368'

_publ_requested_journal              'Organometallics' 
# Publication choise FI FM FO CI CM CO
_publ_requested_category             ?
_publ_requested_coeditor_name        ?

_publ_contact_letter                # Include date of submission
;
 Date of submission :  2003-12-08

 Consider this CIF submission for deposition of the first
 X-ray structure of a manuscript to be submitted to : Organometallics
  (Our Compound_Identification_Code : CP594)
;

#===============================================================================

# 2. PROCESSING SUMMARY (JOURNAL OFFICE ONLY)

_journal_date_recd_electronic        ?

_journal_date_to_coeditor            ?
_journal_date_from_coeditor          ?
_journal_date_accepted               ?

_journal_date_printers_first         ?
_journal_date_printers_final         ?
_journal_date_proofs_out             ?
_journal_date_proofs_in              ?

_journal_coeditor_name               ?
_journal_coeditor_code               ?
_journal_coeditor_notes             
; ?
;

_journal_techeditor_code             ?
_journal_techeditor_notes           
; ?
;

_journal_coden_ASTM                  ?
_journal_name_full                   ?
_journal_year                        ?
_journal_volume                      ?
_journal_issue                       ?
_journal_page_first                  ?
_journal_page_last                   ?


_journal_suppl_publ_number           ?
_journal_suppl_publ_pages            ?


#===============================================================================

# 3. TITLE AND AUTHOR LIST

_publ_section_title                 
;
 ?
;
_publ_section_title_footnote        
;
 ?
;

# The loop structure below should contain the names and adresses of all
# authors, in the required order of publication. Repeat as necessary.


loop_
_publ_author_name                   
_publ_author_footnote               
_publ_author_address                

   'Meetsma, Auke'
;
 ? # author related footnote
;
;
     Crystal Structure Center,
     Inorganic Solid State Chemistry Laboratory
     Chemical Physics,
     Materials Science Center,
     Groningen University,
     Nijenborgh 4,
     NL-9747 AG Groningen,
     The Netherlands.
;

#===============================================================================

# 4. TEXT

_publ_section_synopsis              
;
 ?
;
_publ_section_abstract              
;
 ?
;

# Insert blank lines between paragraphs

_publ_section_comment               
;
 ?
;
_publ_section_exptl_prep            
;
 ?
;
_publ_section_exptl_refinement      
;
 ?
;

# Insert blank lines between references

_publ_section_references            
;
 Beurskens, P.T., Beurskens, G., Gelder, R. de   Garc\'ia-Granda, S.
  Gould, R.O.  Isra\"el, & Smits, J.M.M. (1999).
  The DIRDIF99 program system, Technical Report of the Crystallography 
   Laboratory, University of Nijmegen, The Netherlands.

 Bondi, A. (1964). J. Phys. Chem. 68, 441-451.

 Bruker, (2000). SMART, SAINT, SADABS, XPREP and  SHELXTL/NT.
  Software Reference Manual Bruker AXS Inc. Madison, Wisconsin, USA.

 International Tables for Crystallography (1983). Vol. A. 
   Space-group symmetry, edited by T. Hahn. Dordrecht: Reidel.
   (Present distributor Kluwer Academic Publishers, Dordrecht).

 International Tables for Crystallography (1992). Vol. C. 
   Edited by A.J.C Wilson, Kluwer Academic Publishers, 
   Dordrecht, The Netherlands.

 Le Page, Y. (1987). J. Appl. Cryst. 20, 264-269.

 Le Page, Y. (1988). J. Appl. Cryst. 21, 983-984.

 Meetsma, A. (2000). Extended version of the program PLUTO. 
   Groningen University, The Netherlands. (unpublished). 

 Sheldrick, G.M. SHELXL97. Program for crystal structure
   refinement. University of G\"ottingen, Germany, 1997.

 Sheldrick, G.M. SADABS. Version 2. Empirical Absorption Correction Program.
   University of G\"ottingen, Germany, 2001

 Spek, A.L. (1988). J. Appl. Cryst. 21, 578-579.

 Spek, A.L. (1990). Acta Cryst. A46, C-34.

 Spek, A.L. (1997). HELENA, Program for Datareduction, Utrecht
   University, The Netherlands.

 Spek, A.L. (1994). Am. Crystallogr. Assoc.-Abstracts, 22, 66.
;


_publ_section_figure_captions       
;
     Fig. 1. Chemical structural diagram (scheme 1) of the title compound

     Fig. 2. Perspective PLUTO drawing of the molecule illustrating the
             configuration and the adopted numbering scheme.

     Fig. 3. Molecular packing viewed down unit cell axes.

     Fig. 4. Perspective ORTEP drawing of the title compound. 
             All non-hydrogen atoms are represented by thermal vibrational
             ellipsoids drawn to encompass 50% of the electron density.
             The hydrogen atoms are drawn with an arbitrary radius.
;

#===============================================================================

data_c23h48n5

#===============================================================================

# 5. CHEMICAL DATA

_chemical_name_systematic           
;
 ?
;
_chemical_name_common                ?
_chemical_melting_point              ?
_chemical_formula_moiety            
'C23 H48 N5 Si Y'
_chemical_formula_structural         ?
# Ex: 'C12 H16 N2 O6, H2 O' and '(Cd 2+)3, (C6 N6 Cr 3-)2, 2(H2 O)' 
_chemical_formula_sum               
'C23 H48 N5 Si Y'
_chemical_formula_weight                511.66
_chemical_compound_source           'see text'

loop_
_atom_type_symbol                   
_atom_type_description              
_atom_type_scat_dispersion_real     
_atom_type_scat_dispersion_imag     
_atom_type_scat_source              
 Y   Y   -2.7962    3.5667
 'International Tables Vol C Tables 4.2.6.8 and 6.1.1.4'
Si  Si    0.0817    0.0704
 'International Tables Vol C Tables 4.2.6.8 and 6.1.1.4'
 N   N    0.0061    0.0033
 'International Tables Vol C Tables 4.2.6.8 and 6.1.1.4'
 H   H    0.0000    0.0000
 'International Tables Vol C Tables 4.2.6.8 and 6.1.1.4'
 C   C    0.0033    0.0016
 'International Tables Vol C Tables 4.2.6.8 and 6.1.1.4'

#===============================================================================

# 6. CRYSTAL DATA

_symmetry_cell_setting                 Monoclinic
_symmetry_space_group_name_Hall      '-P 2ybc'
_symmetry_space_group_name_H-M       'P 21/c'

loop_
_symmetry_equiv_pos_as_xyz          
 x,y,z                         
 -x,1/2+y,1/2-z                
 -x,-y,-z                      
 x,1/2-y,1/2+z                 

_cell_length_a                         14.7891(6)
_cell_length_b                          9.4573(4)
_cell_length_c                         19.2445(8)
_cell_angle_alpha                       90
_cell_angle_beta                       91.167(1)
_cell_angle_gamma                      90
_cell_volume                         2691.07(19)
_cell_formula_units_Z                  4
_cell_measurement_temperature         95 
_cell_measurement_reflns_used        7104
_cell_measurement_theta_min          2.40
_cell_measurement_theta_max          29.03
_cell_special_details               
;
 The final unit cell was obtained from the xyz centroids of 
  1108 reflections after integration using the SAINT software
  package (Bruker, 2000). 

 Reduced cell calculations did not indicate any higher metric lattice symmetry
 and examination of the final atomic coordinates of the structure did not yield
 extra symmetry elements (Spek, 1988; Le Page 1987, 1988)
;

_exptl_crystal_description        'thick needle'
_exptl_crystal_colour             'colourless'
_exptl_crystal_size_max           0.30 
_exptl_crystal_size_mid           0.17 
_exptl_crystal_size_min           0.14 
_exptl_crystal_size_rad           ? 
_exptl_crystal_density_meas       ? 
_exptl_crystal_density_diffrn     1.263 
_exptl_crystal_density_method     'Not Measured' 
_exptl_crystal_F_000              1096 
_exptl_absorpt_coefficient_mu     2.230 
_exptl_absorpt_correction_type    'empirical'            
_exptl_absorpt_process_details     'SADABS (Sheldrick, Bruker, 2000)'
_exptl_absorpt_correction_T_min   0.5543 
_exptl_absorpt_correction_T_max   0.7454 
 

#===============================================================================

# 7. EXPERIMENTAL DATA

_exptl_special_details 
; 
 ? 
; 
 
_diffrn_ambient_temperature       95(2) 
_diffrn_radiation_wavelength      0.71073 
_diffrn_radiation_type            MoK\a 
_diffrn_radiation_source             'fine focus sealed Siemens Mo tube '
_diffrn_radiation_monochromator      'parallel mounted graphite'
_diffrn_radiation_detector          
;
  CCD area-detector
;
_diffrn_measurement_device_type     
;
  Bruker Smart Apex 
;

_diffrn_measurement_method           'phi and omega scans'
_diffrn_special_details             
;
 Crystal into the cold nitrogen stream of the low-temparature
  unit (KRYOFLEX, (Bruker, 2000)).
;
_diffrn_detector_area_resol_mean     ?

_diffrn_standards_number             ?
_diffrn_standards_interval_count     ?
_diffrn_standards_interval_time      ?
_diffrn_standards_decay_%            ? 

loop_
_diffrn_standard_refln_index_h      
_diffrn_standard_refln_index_k      
_diffrn_standard_refln_index_l      
 ? ? ?

# number of measured reflections (redundant set)
_diffrn_reflns_number             25856 
_diffrn_reflns_av_R_equivalents   0.0404 
_diffrn_reflns_av_sigmaI/netI     0.0480 
_diffrn_reflns_limit_h_min        -20 
_diffrn_reflns_limit_h_max        20 
_diffrn_reflns_limit_k_min        -13 
_diffrn_reflns_limit_k_max        12 
_diffrn_reflns_limit_l_min        -25 
_diffrn_reflns_limit_l_max        25 
_diffrn_reflns_theta_min          2.40 
_diffrn_reflns_theta_max          29.81 
_diffrn_measured_fraction_theta_max    0.884 
_diffrn_reflns_theta_full              29.81 
_diffrn_measured_fraction_theta_full   0.884 

_diffrn_reflns_reduction_process    
;
 Intensity data were corrected for Lorentz and polarization
  effects, decay and absorption and reduced to F~o~^2^
  using SAINT (Bruker, 2000) and SABABS (Sheldrick, 2000)

 Intensity data were corrected for Lorentz and polarization effects,
  scale variation, for absorption and reduced to F~o~^2^
;

# number of unique reflections
_reflns_number_total              7205 
_reflns_number_gt                 5715 
_reflns_threshold_expression      >2sigma(I) 
 

_computing_data_collection          'SMART, Bruker Version 5.168, 2000'
_computing_cell_refinement          'SAINT, Bruker Version 6.02A, 2000'
_computing_data_reduction           'XPREP, Bruker Version 5.1/NT, 2000'
_computing_structure_solution       
;
 DIRDIF-99 (Beurskens et al., 1999)
;
_computing_structure_refinement      'SHELXL-97 (Sheldrick, 1997)'
_computing_molecular_graphics       
;
 PLUTO (Meetsma, 2000) 
 PLATON (Spek, 1994, 1996)
;

_computing_publication_material     
;
 PLATON (Spek, 1990)
 SHELXL (Sheldrick, 1997)
;

#===============================================================================

# 8. REFINEMENT DATA

 
_refine_special_details 
; 
 Refinement of F^2^ against ALL reflections.  The weighted R-factor wR and 
 goodness of fit S are based on F^2^, conventional R-factors R are based 
 on F, with F set to zero for negative F^2^. The threshold expression of 
 F^2^ > 2sigma(F^2^) is used only for calculating R-factors(gt) etc. and is 
 not relevant to the choice of reflections for refinement.  R-factors based 
 on F^2^ are statistically about twice as large as those based on F, and R- 
 factors based on ALL data will be even larger. 
; 
 
_refine_ls_structure_factor_coef  Fsqd  
_refine_ls_matrix_type            full 
_refine_ls_weighting_details      calc 
_refine_ls_weighting_scheme 
 'calc w=1/[\s^2^(Fo^2^)+(0.0379P)^2^+0.0787P] where P=(Fo^2^+2Fc^2^)/3' 
_atom_sites_solution_primary           heavy
_atom_sites_solution_secondary    direct 
_atom_sites_solution_hydrogens    difmap
_refine_ls_hydrogen_treatment     refall
_refine_ls_extinction_method      none 
_refine_ls_extinction_coef        ? 
_refine_ls_abs_structure_details  ?
_refine_ls_abs_structure_Flack    ? 
_refine_ls_number_reflns          7205 
_refine_ls_number_parameters      463 
_refine_ls_number_restraints      0 
_refine_ls_number_constraints     ? 
_refine_ls_R_factor_all           0.0507 
_refine_ls_R_factor_gt            0.0335 
_refine_ls_wR_factor_ref          0.0775 
_refine_ls_wR_factor_gt           0.0724 
_refine_ls_goodness_of_fit_ref    1.039 
_refine_ls_restrained_S_all       1.039 
_refine_ls_shift/su_max           0.001 
_refine_ls_shift/su_mean          0.000 
 
_refine_diff_density_max          0.528 
_refine_diff_density_min         -0.276 
_refine_diff_density_rms          0.073 

#===============================================================================

# 9. ATOMIC COORDINATES AND DISPLACEMENT PARAMETERS

loop_
_atom_site_label                    
_atom_site_type_symbol              
_atom_site_thermal_displace_type    
_atom_site_fract_x                  
_atom_site_fract_y                  
_atom_site_fract_z                  
_atom_site_occupancy                
_atom_site_U_iso_or_equiv           
_atom_site_calc_flag                
_atom_site_refinement_flags         
Y Y Uani 0.25130(1) 0.10076(2) 0.42060(1) 1.000 0.0132(1) . .                   
Si Si Uani 0.09070(3) -0.09790(5) 0.29494(3) 1.000 0.0164(2) . .                
N1 N Uani 0.28964(10) 0.00575(16) 0.52330(8) 1.000 0.0177(4) . .                
N2 N Uani 0.34752(10) 0.28043(16) 0.48460(8) 1.000 0.0197(5) . .                
N3 N Uani 0.32805(10) 0.26396(16) 0.33383(8) 1.000 0.0184(4) . .                
N4 N Uani 0.14961(10) 0.31058(16) 0.47328(8) 1.000 0.0187(4) . .                
N5 N Uani 0.35723(9) -0.01973(17) 0.35826(8) 1.000 0.0174(5) . .                
C1 C Uani 0.16563(16) -0.1596(3) 0.51767(13) 1.000 0.0298(7) . .                
C2 C Uani 0.31346(16) -0.2435(2) 0.56412(12) 1.000 0.0260(7) . .                
C3 C Uani 0.22046(19) -0.0797(3) 0.63358(12) 1.000 0.0321(7) . .                
C4 C Uani 0.24944(13) -0.1154(2) 0.55946(10) 1.000 0.0202(5) . .                
C5 C Uani 0.36503(14) 0.0681(2) 0.56181(11) 1.000 0.0245(6) . .                 
C6 C Uani 0.41214(13) 0.1807(2) 0.51971(12) 1.000 0.0247(6) . .                 
C7 C Uani 0.39720(13) 0.3770(2) 0.43872(11) 1.000 0.0237(6) . .                 
C8 C Uani 0.41380(12) 0.3101(2) 0.36856(11) 1.000 0.0232(6) . .                 
C9 C Uani 0.29478(14) 0.3602(2) 0.53599(11) 1.000 0.0243(6) . .                 
C10 C Uani 0.20919(14) 0.4211(2) 0.50335(12) 1.000 0.0229(6) . .                
C11 C Uani 0.09983(15) 0.2405(2) 0.52917(11) 1.000 0.0243(6) . .                
C12 C Uani 0.08182(14) 0.3789(2) 0.42665(11) 1.000 0.0231(6) . .                
C13 C Uani 0.27779(14) 0.3887(2) 0.30765(12) 1.000 0.0250(6) . .                
C14 C Uani 0.34729(13) 0.1717(2) 0.27325(10) 1.000 0.0209(6) . .                
C15 C Uani 0.39461(12) 0.0343(2) 0.29311(10) 1.000 0.0193(5) . .                
C16 C Uani 0.38670(13) -0.0750(2) 0.23643(11) 1.000 0.0229(6) . .               
C17 C Uani 0.40795(12) -0.2078(2) 0.25361(11) 1.000 0.0247(6) . .               
C18 C Uani 0.42257(13) -0.2435(2) 0.32570(11) 1.000 0.0232(6) . .               
C19 C Uani 0.38783(12) -0.1522(2) 0.37312(11) 1.000 0.0204(6) . .               
C20 C Uani 0.10887(12) 0.0403(2) 0.36075(10) 1.000 0.0181(6) . .                
C21 C Uani 0.13197(15) -0.0418(3) 0.20747(11) 1.000 0.0246(7) . .               
C22 C Uani -0.03191(13) -0.1427(3) 0.27976(12) 1.000 0.0248(6) . .              
C23 C Uani 0.14818(15) -0.2686(2) 0.31904(12) 1.000 0.0263(7) . .               
H1 H Uiso 0.1408(15) -0.248(3) 0.5360(12) 1.000 0.037(6) . .                    
H1' H Uiso 0.1174(16) -0.085(2) 0.5216(12) 1.000 0.033(6) . .                   
H1" H Uiso 0.1812(15) -0.179(2) 0.4722(13) 1.000 0.034(7) . .                   
H2 H Uiso 0.2848(14) -0.320(2) 0.5892(11) 1.000 0.023(5) . .                    
H2' H Uiso 0.3288(16) -0.280(3) 0.5199(13) 1.000 0.040(7) . .                   
H2" H Uiso 0.3671(16) -0.225(2) 0.5864(12) 1.000 0.037(7) . .                   
H3 H Uiso 0.1878(15) -0.156(2) 0.6544(12) 1.000 0.033(6) . .                    
H3' H Uiso 0.2702(16) -0.063(2) 0.6629(13) 1.000 0.032(6) . .                   
H3" H Uiso 0.1799(17) -0.001(3) 0.6325(13) 1.000 0.049(7) . .                   
H5 H Uiso 0.3459(15) 0.105(2) 0.6056(13) 1.000 0.029(6) . .                     
H5' H Uiso 0.4120(13) 0.005(2) 0.5731(10) 1.000 0.018(5) . .                    
H6 H Uiso 0.4487(13) 0.133(2) 0.4815(11) 1.000 0.017(5) . .                     
H6' H Uiso 0.4535(14) 0.230(2) 0.5481(11) 1.000 0.028(6) . .                    
H7 H Uiso 0.3629(14) 0.462(2) 0.4337(11) 1.000 0.030(6) . .                     
H7' H Uiso 0.4559(14) 0.4026(19) 0.4602(11) 1.000 0.018(5) . .                  
H8 H Uiso 0.4523(12) 0.229(2) 0.3747(10) 1.000 0.016(5) . .                     
H8' H Uiso 0.4439(14) 0.375(2) 0.3399(12) 1.000 0.022(5) . .                    
H9 H Uiso 0.2787(13) 0.295(2) 0.5737(10) 1.000 0.015(5) . .                     
H9' H Uiso 0.3310(14) 0.437(2) 0.5561(11) 1.000 0.026(6) . .                    
H10 H Uiso 0.2250(13) 0.483(2) 0.4691(10) 1.000 0.018(5) . .                    
H10' H Uiso 0.1755(14) 0.478(2) 0.5384(12) 1.000 0.032(6) . .                   
H11 H Uiso 0.1400(14) 0.197(2) 0.5591(12) 1.000 0.027(6) . .                    
H11' H Uiso 0.0650(13) 0.308(2) 0.5562(10) 1.000 0.022(5) . .                   
H11" H Uiso 0.0605(14) 0.171(2) 0.5091(12) 1.000 0.029(6) . .                   
H12 H Uiso 0.1116(16) 0.419(2) 0.3898(13) 1.000 0.033(7) . .                    
H12' H Uiso 0.0485(14) 0.457(2) 0.4510(11) 1.000 0.027(6) . .                   
H12" H Uiso 0.0410(14) 0.310(2) 0.4092(11) 1.000 0.026(6) . .                   
H13 H Uiso 0.2234(14) 0.361(2) 0.2840(11) 1.000 0.024(6) . .                    
H13' H Uiso 0.2642(13) 0.453(2) 0.3452(11) 1.000 0.018(5) . .                   
H13" H Uiso 0.3117(15) 0.441(2) 0.2733(12) 1.000 0.036(7) . .                   
H14 H Uiso 0.2866(12) 0.1475(19) 0.2514(10) 1.000 0.011(5) . .                  
H14' H Uiso 0.3824(14) 0.224(2) 0.2405(11) 1.000 0.027(6) . .                   
H15 H Uiso 0.4612(14) 0.054(2) 0.3009(10) 1.000 0.024(5) . .                    
H16 H Uiso 0.3682(14) -0.050(2) 0.1912(12) 1.000 0.032(6) . .                   
H17 H Uiso 0.4061(12) -0.281(2) 0.2199(10) 1.000 0.020(5) . .                   
H18 H Uiso 0.4388(14) -0.337(3) 0.3411(12) 1.000 0.030(6) . .                   
H19 H Uiso 0.3800(13) -0.183(2) 0.4207(11) 1.000 0.022(5) . .                   
H20 H Uiso 0.0909(15) 0.125(2) 0.3410(12) 1.000 0.030(6) . .                    
H20' H Uiso 0.0692(16) 0.022(3) 0.3946(13) 1.000 0.042(7) . .                   
H21 H Uiso 0.1093(15) -0.101(2) 0.1729(12) 1.000 0.026(6) . .                   
H21' H Uiso 0.1132(19) 0.051(3) 0.1955(14) 1.000 0.059(8) . .                   
H21" H Uiso 0.1940(18) -0.040(3) 0.2063(12) 1.000 0.044(7) . .                  
H22 H Uiso -0.0651(16) -0.061(3) 0.2656(13) 1.000 0.040(7) . .                  
H22' H Uiso -0.0405(16) -0.214(3) 0.2450(14) 1.000 0.050(8) . .                 
H22" H Uiso -0.0594(16) -0.170(3) 0.3215(14) 1.000 0.040(7) . .                 
H23 H Uiso 0.2150(17) -0.256(2) 0.3237(12) 1.000 0.038(6) . .                   
H23' H Uiso 0.1353(16) -0.339(3) 0.2837(13) 1.000 0.040(7) . .                  
H23" H Uiso 0.1227(16) -0.308(3) 0.3613(14) 1.000 0.043(7) . .                  

loop_
_atom_site_aniso_label              
_atom_site_aniso_U_11               
_atom_site_aniso_U_22               
_atom_site_aniso_U_33               
_atom_site_aniso_U_23               
_atom_site_aniso_U_13               
_atom_site_aniso_U_12               
Y 0.0145(1) 0.0129(1) 0.0122(1) -0.0012(1) -0.0007(1) 0.0008(1)                 
Si 0.0179(2) 0.0156(3) 0.0156(3) -0.0015(2) -0.0015(2) 0.0003(2)                
N1 0.0225(7) 0.0163(8) 0.0143(8) -0.0010(7) -0.0017(6) 0.0021(6)                
N2 0.0207(7) 0.0166(8) 0.0215(9) -0.0025(7) -0.0037(6) 0.0002(6)                
N3 0.0177(7) 0.0177(8) 0.0197(8) 0.0000(7) 0.0002(6) -0.0013(6)                 
N4 0.0214(7) 0.0159(8) 0.0187(8) -0.0012(7) -0.0008(6) 0.0028(6)                
N5 0.0174(7) 0.0197(9) 0.0152(8) -0.0008(7) 0.0001(6) 0.0020(6)                 
C1 0.0348(12) 0.0243(12) 0.0301(13) 0.0096(10) -0.0032(10) -0.0060(10)          
C2 0.0366(12) 0.0181(11) 0.0232(12) 0.0010(9) 0.0002(10) 0.0059(9)              
C3 0.0513(14) 0.0257(13) 0.0196(11) 0.0027(10) 0.0085(10) 0.0080(11)            
C4 0.0293(9) 0.0180(10) 0.0134(9) 0.0005(8) -0.0004(7) 0.0031(8)                
C5 0.0299(10) 0.0235(11) 0.0198(11) -0.0023(8) -0.0092(8) 0.0059(8)             
C6 0.0219(9) 0.0230(11) 0.0287(12) -0.0028(9) -0.0101(9) -0.0003(8)             
C7 0.0217(9) 0.0192(11) 0.0299(12) -0.0043(9) -0.0034(8) -0.0040(8)             
C8 0.0176(9) 0.0210(10) 0.0312(12) 0.0014(9) 0.0021(8) -0.0048(8)               
C9 0.0312(10) 0.0190(10) 0.0225(11) -0.0071(9) -0.0037(9) 0.0014(8)             
C10 0.0291(10) 0.0168(11) 0.0228(11) -0.0036(9) 0.0015(8) 0.0032(8)             
C11 0.0284(10) 0.0227(11) 0.0220(11) 0.0005(9) 0.0055(9) 0.0057(9)              
C12 0.0245(9) 0.0215(11) 0.0234(11) -0.0002(9) -0.0001(8) 0.0073(8)             
C13 0.0284(10) 0.0228(11) 0.0237(11) 0.0044(10) 0.0001(9) 0.0028(9)             
C14 0.0231(9) 0.0233(11) 0.0163(10) 0.0008(8) 0.0038(8) -0.0014(8)              
C15 0.0158(8) 0.0238(10) 0.0184(10) -0.0018(8) 0.0032(7) -0.0008(7)             
C16 0.0214(9) 0.0315(12) 0.0159(10) -0.0050(9) 0.0026(8) 0.0032(8)              
C17 0.0196(9) 0.0291(12) 0.0256(11) -0.0110(10) 0.0019(8) 0.0035(8)             
C18 0.0225(9) 0.0211(11) 0.0259(11) -0.0030(9) -0.0003(8) 0.0057(8)             
C19 0.0189(9) 0.0230(10) 0.0192(10) -0.0001(8) -0.0017(7) 0.0045(7)             
C20 0.0197(9) 0.0172(10) 0.0172(10) -0.0011(8) -0.0014(7) 0.0019(7)             
C21 0.0300(11) 0.0233(12) 0.0206(11) -0.0034(9) 0.0021(9) -0.0022(9)            
C22 0.0214(9) 0.0286(12) 0.0244(12) -0.0063(10) -0.0007(9) -0.0038(8)           
C23 0.0350(12) 0.0181(11) 0.0255(12) -0.0029(9) -0.0044(9) 0.0043(9)            

#===============================================================================

# 10. MOLECULAR GEOMETRY

_geom_special_details               
;
 Bond distances, angles etc. have been calculated using the
 rounded fractional coordinates. All esds are estimated
 from the variances of the (full) variance-covariance matrix.
 The cell esds are taken into account in the estimation of
 distances, angles and torsion angles
;

loop_
_geom_bond_atom_site_label_1        
_geom_bond_atom_site_label_2        
_geom_bond_distance                 
_geom_bond_site_symmetry_1          
_geom_bond_site_symmetry_2          
_geom_bond_publ_flag                
 Y       N1       2.2337(15)                     .       .                   yes
 Y       N2       2.5215(15)                     .       .                   yes
 Y       N3       2.5566(15)                     .       .                   yes
 Y       N4       2.6998(15)                     .       .                   yes
 Y       N5       2.2953(15)                     .       .                   yes
 Y       C20      2.4478(18)                     .       .                   yes
 Si      C20        1.836(2)                     .       .                   yes
 Si      C21        1.879(2)                     .       .                   yes
 Si      C22        1.879(2)                     .       .                   yes
 Si      C23        1.878(2)                     .       .                   yes
 N1      C4         1.472(2)                     .       .                   yes
 N1      C5         1.451(3)                     .       .                   yes
 N2      C6         1.494(3)                     .       .                   yes
 N2      C7         1.476(2)                     .       .                   yes
 N2      C9         1.479(3)                     .       .                   yes
 N3      C8         1.487(2)                     .       .                   yes
 N3      C13        1.477(2)                     .       .                   yes
 N3      C14        1.488(2)                     .       .                   yes
 N4      C10        1.477(3)                     .       .                   yes
 N4      C11        1.473(3)                     .       .                   yes
 N4      C12        1.480(3)                     .       .                   yes
 N5      C15        1.472(2)                     .       .                   yes
 N5      C19        1.360(2)                     .       .                   yes
 C1      C4         1.522(3)                     .       .                   no 
 C2      C4         1.539(3)                     .       .                   no 
 C3      C4         1.535(3)                     .       .                   no 
 C5      C6         1.516(3)                     .       .                   no 
 C7      C8         1.516(3)                     .       .                   no 
 C9      C10        1.515(3)                     .       .                   no 
 C14     C15        1.521(3)                     .       .                   no 
 C15     C16        1.506(3)                     .       .                   no 
 C16     C17        1.335(3)                     .       .                   no 
 C17     C18        1.440(3)                     .       .                   no 
 C18     C19        1.364(3)                     .       .                   no 
 C1      H1          0.98(3)                     .       .                   no 
 C1      H1'         1.01(2)                     .       .                   no 
 C1      H1"         0.93(2)                     .       .                   no 
 C2      H2          0.97(2)                     .       .                   no 
 C2      H2'         0.95(3)                     .       .                   no 
 C2      H2"         0.91(2)                     .       .                   no 
 C3      H3          0.96(2)                     .       .                   no 
 C3      H3'         0.93(2)                     .       .                   no 
 C3      H3"         0.96(3)                     .       .                   no 
 C5      H5          0.96(2)                     .       .                   no 
 C5      H5'       0.938(19)                     .       .                   no 
 C6      H6          1.03(2)                     .       .                   no 
 C6      H6'         0.94(2)                     .       .                   no 
 C7      H7        0.954(19)                     .       .                   no 
 C7      H7'         0.98(2)                     .       .                   no 
 C8      H8        0.961(19)                     .       .                   no 
 C8      H8'         0.94(2)                     .       .                   no 
 C9      H9        0.985(19)                     .       .                   no 
 C9      H9'         0.98(2)                     .       .                   no 
 C10     H10       0.915(19)                     .       .                   no 
 C10     H10'        1.00(2)                     .       .                   no 
 C11     H11         0.92(2)                     .       .                   no 
 C11     H11'      0.977(19)                     .       .                   no 
 C11     H11"        0.95(2)                     .       .                   no 
 C12     H12         0.92(2)                     .       .                   no 
 C12     H12'        1.01(2)                     .       .                   no 
 C12     H12"        0.95(2)                     .       .                   no 
 C13     H13         0.95(2)                     .       .                   no 
 C13     H13'        0.97(2)                     .       .                   no 
 C13     H13"        0.97(2)                     .       .                   no 
 C14     H14       1.010(18)                     .       .                   no 
 C14     H14'        0.96(2)                     .       .                   no 
 C15     H15         1.01(2)                     .       .                   no 
 C16     H16         0.94(2)                     .       .                   no 
 C17     H17       0.949(19)                     .       .                   no 
 C18     H18         0.96(3)                     .       .                   no 
 C19     H19         0.97(2)                     .       .                   no 
 C20     H20         0.92(2)                     .       .                   no 
 C20     H20'        0.90(2)                     .       .                   no 
 C21     H21         0.93(2)                     .       .                   no 
 C21     H21'        0.95(3)                     .       .                   no 
 C21     H21"        0.92(3)                     .       .                   no 
 C22     H22         0.95(3)                     .       .                   no 
 C22     H22'        0.96(3)                     .       .                   no 
 C22     H22"        0.94(3)                     .       .                   no 
 C23     H23         1.00(3)                     .       .                   no 
 C23     H23'        0.97(3)                     .       .                   no 
 C23     H23"        0.98(3)                     .       .                   no 

loop_
_geom_angle_atom_site_label_1       
_geom_angle_atom_site_label_2       
_geom_angle_atom_site_label_3       
_geom_angle                         
_geom_angle_site_symmetry_1         
_geom_angle_site_symmetry_2         
_geom_angle_site_symmetry_3         
_geom_angle_publ_flag               
 N1      Y       N2         73.04(5)             .       .       .           yes
 N1      Y       N3        135.45(5)             .       .       .           yes
 N1      Y       N4         95.55(5)             .       .       .           yes
 N1      Y       N5         95.69(5)             .       .       .           yes
 N1      Y       C20       121.53(6)             .       .       .           yes
 N2      Y       N3         70.04(5)             .       .       .           yes
 N2      Y       N4         68.56(5)             .       .       .           yes
 N2      Y       N5        101.86(5)             .       .       .           yes
 N2      Y       C20       149.20(6)             .       .       .           yes
 N3      Y       N4         93.42(5)             .       .       .           yes
 N3      Y       N5         68.99(5)             .       .       .           yes
 N3      Y       C20       102.88(6)             .       .       .           yes
 N4      Y       N5        162.26(5)             .       .       .           yes
 N4      Y       C20        82.40(5)             .       .       .           yes
 N5      Y       C20       103.18(6)             .       .       .           yes
 C20     Si      C21      111.80(10)             .       .       .           yes
 C20     Si      C22      113.26(10)             .       .       .           yes
 C20     Si      C23       112.48(9)             .       .       .           yes
 C21     Si      C22      104.74(10)             .       .       .           yes
 C21     Si      C23      108.08(11)             .       .       .           yes
 C22     Si      C23      105.96(11)             .       .       .           yes
 Y       N1      C4       129.32(12)             .       .       .           yes
 Y       N1      C5       117.83(12)             .       .       .           yes
 C4      N1      C5       112.85(15)             .       .       .           yes
 Y       N2      C6        98.33(10)             .       .       .           yes
 Y       N2      C7       114.05(11)             .       .       .           yes
 Y       N2      C9       111.74(11)             .       .       .           yes
 C6      N2      C7       109.84(14)             .       .       .           yes
 C6      N2      C9       111.15(15)             .       .       .           yes
 C7      N2      C9       111.10(14)             .       .       .           yes
 Y       N3      C8       105.64(11)             .       .       .           yes
 Y       N3      C13      118.54(11)             .       .       .           yes
 Y       N3      C14      104.61(10)             .       .       .           yes
 C8      N3      C13      109.73(14)             .       .       .           yes
 C8      N3      C14      110.44(14)             .       .       .           yes
 C13     N3      C14      107.69(15)             .       .       .           yes
 Y       N4      C10      109.55(11)             .       .       .           yes
 Y       N4      C11      103.53(11)             .       .       .           yes
 Y       N4      C12      117.95(11)             .       .       .           yes
 C10     N4      C11      109.59(15)             .       .       .           yes
 C10     N4      C12      108.65(14)             .       .       .           yes
 C11     N4      C12      107.25(15)             .       .       .           yes
 Y       N5      C15      123.02(11)             .       .       .           yes
 Y       N5      C19      125.10(12)             .       .       .           yes
 C15     N5      C19      111.69(15)             .       .       .           yes
 N1      C4      C1       107.24(17)             .       .       .           yes
 N1      C4      C2       112.72(16)             .       .       .           yes
 N1      C4      C3       113.02(17)             .       .       .           yes
 C1      C4      C2       107.94(18)             .       .       .           no 
 C1      C4      C3       108.15(18)             .       .       .           no 
 C2      C4      C3       107.58(18)             .       .       .           no 
 N1      C5      C6       111.66(17)             .       .       .           yes
 N2      C6      C5       112.85(16)             .       .       .           yes
 N2      C7      C8       111.48(15)             .       .       .           yes
 N3      C8      C7       111.77(15)             .       .       .           yes
 N2      C9      C10      111.36(17)             .       .       .           yes
 N4      C10     C9       112.33(15)             .       .       .           yes
 N3      C14     C15      113.48(15)             .       .       .           yes
 N5      C15     C14      109.37(15)             .       .       .           yes
 N5      C15     C16      110.72(15)             .       .       .           yes
 C14     C15     C16      112.08(16)             .       .       .           no 
 C15     C16     C17      116.88(18)             .       .       .           no 
 C16     C17     C18      119.30(19)             .       .       .           no 
 C17     C18     C19      116.42(17)             .       .       .           no 
 N5      C19     C18      124.78(19)             .       .       .           yes
 Y       C20     Si        127.11(9)             .       .       .           yes
 C4      C1      H1        110.5(13)             .       .       .           no 
 C4      C1      H1'       109.8(13)             .       .       .           no 
 C4      C1      H1"       109.7(14)             .       .       .           no 
 H1      C1      H1'       107.4(19)             .       .       .           no 
 H1      C1      H1"       105.8(19)             .       .       .           no 
 H1'     C1      H1"       113.5(19)             .       .       .           no 
 C4      C2      H2        109.9(12)             .       .       .           no 
 C4      C2      H2'       113.1(16)             .       .       .           no 
 C4      C2      H2"       113.9(12)             .       .       .           no 
 H2      C2      H2'          107(2)             .       .       .           no 
 H2      C2      H2"       107.1(18)             .       .       .           no 
 H2'     C2      H2"          106(2)             .       .       .           no 
 C4      C3      H3        112.0(13)             .       .       .           no 
 C4      C3      H3'       111.6(15)             .       .       .           no 
 C4      C3      H3"       109.8(15)             .       .       .           no 
 H3      C3      H3'       105.8(19)             .       .       .           no 
 H3      C3      H3"          106(2)             .       .       .           no 
 H3'     C3      H3"          112(2)             .       .       .           no 
 N1      C5      H5        111.0(13)             .       .       .           no 
 N1      C5      H5'       114.7(12)             .       .       .           no 
 C6      C5      H5        111.1(12)             .       .       .           no 
 C6      C5      H5'       103.0(12)             .       .       .           no 
 H5      C5      H5'       105.0(18)             .       .       .           no 
 N2      C6      H6        107.2(11)             .       .       .           no 
 N2      C6      H6'       110.7(12)             .       .       .           no 
 C5      C6      H6        109.2(11)             .       .       .           no 
 C5      C6      H6'       109.9(13)             .       .       .           no 
 H6      C6      H6'       106.8(17)             .       .       .           no 
 N2      C7      H7        108.2(13)             .       .       .           no 
 N2      C7      H7'       110.3(12)             .       .       .           no 
 C8      C7      H7        110.9(13)             .       .       .           no 
 C8      C7      H7'       108.6(12)             .       .       .           no 
 H7      C7      H7'       107.3(16)             .       .       .           no 
 N3      C8      H8        108.6(11)             .       .       .           no 
 N3      C8      H8'       109.7(13)             .       .       .           no 
 C7      C8      H8        109.3(12)             .       .       .           no 
 C7      C8      H8'       109.7(13)             .       .       .           no 
 H8      C8      H8'       107.8(16)             .       .       .           no 
 N2      C9      H9        108.2(11)             .       .       .           no 
 N2      C9      H9'       110.6(12)             .       .       .           no 
 C10     C9      H9        109.3(11)             .       .       .           no 
 C10     C9      H9'       109.2(12)             .       .       .           no 
 H9      C9      H9'       108.2(17)             .       .       .           no 
 N4      C10     H10       109.2(12)             .       .       .           no 
 N4      C10     H10'      110.0(12)             .       .       .           no 
 C9      C10     H10       108.5(12)             .       .       .           no 
 C9      C10     H10'      110.3(13)             .       .       .           no 
 H10     C10     H10'      106.2(17)             .       .       .           no 
 N4      C11     H11       109.5(13)             .       .       .           no 
 N4      C11     H11'      111.8(11)             .       .       .           no 
 N4      C11     H11"      108.9(14)             .       .       .           no 
 H11     C11     H11'      107.5(18)             .       .       .           no 
 H11     C11     H11"      109.1(18)             .       .       .           no 
 H11'    C11     H11"      110.0(17)             .       .       .           no 
 N4      C12     H12       108.5(15)             .       .       .           no 
 N4      C12     H12'      111.7(12)             .       .       .           no 
 N4      C12     H12"      109.5(12)             .       .       .           no 
 H12     C12     H12'      107.5(17)             .       .       .           no 
 H12     C12     H12"      108.7(19)             .       .       .           no 
 H12'    C12     H12"      110.8(17)             .       .       .           no 
 N3      C13     H13       110.9(12)             .       .       .           no 
 N3      C13     H13'      110.9(12)             .       .       .           no 
 N3      C13     H13"      112.0(12)             .       .       .           no 
 H13     C13     H13'      110.1(17)             .       .       .           no 
 H13     C13     H13"      104.9(18)             .       .       .           no 
 H13'    C13     H13"      107.8(17)             .       .       .           no 
 N3      C14     H14       106.1(11)             .       .       .           no 
 N3      C14     H14'      109.0(12)             .       .       .           no 
 C15     C14     H14       108.2(10)             .       .       .           no 
 C15     C14     H14'      110.6(12)             .       .       .           no 
 H14     C14     H14'      109.3(17)             .       .       .           no 
 N5      C15     H15       108.6(11)             .       .       .           no 
 C14     C15     H15       108.8(11)             .       .       .           no 
 C16     C15     H15       107.2(11)             .       .       .           no 
 C15     C16     H16       121.1(12)             .       .       .           no 
 C17     C16     H16       122.0(12)             .       .       .           no 
 C16     C17     H17       120.9(12)             .       .       .           no 
 C18     C17     H17       119.3(12)             .       .       .           no 
 C17     C18     H18       123.0(14)             .       .       .           no 
 C19     C18     H18       118.1(14)             .       .       .           no 
 N5      C19     H19       115.4(11)             .       .       .           no 
 C18     C19     H19       119.7(11)             .       .       .           no 
 Y       C20     H20       103.2(14)             .       .       .           no 
 Y       C20     H20'      105.7(16)             .       .       .           no 
 Si      C20     H20       107.3(14)             .       .       .           no 
 Si      C20     H20'      105.9(17)             .       .       .           no 
 H20     C20     H20'         106(2)             .       .       .           no 
 Si      C21     H21       110.7(14)             .       .       .           no 
 Si      C21     H21'      112.4(17)             .       .       .           no 
 Si      C21     H21"      111.7(15)             .       .       .           no 
 H21     C21     H21'         107(2)             .       .       .           no 
 H21     C21     H21"         110(2)             .       .       .           no 
 H21'    C21     H21"         105(2)             .       .       .           no 
 Si      C22     H22       110.6(15)             .       .       .           no 
 Si      C22     H22'      112.4(14)             .       .       .           no 
 Si      C22     H22"      111.1(15)             .       .       .           no 
 H22     C22     H22'         108(2)             .       .       .           no 
 H22     C22     H22"         104(2)             .       .       .           no 
 H22'    C22     H22"         110(2)             .       .       .           no 
 Si      C23     H23       111.2(11)             .       .       .           no 
 Si      C23     H23'      109.6(16)             .       .       .           no 
 Si      C23     H23"      110.7(16)             .       .       .           no 
 H23     C23     H23'      109.0(19)             .       .       .           no 
 H23     C23     H23"      111.6(19)             .       .       .           no 
 H23'    C23     H23"         104(2)             .       .       .           no 

loop_
_geom_torsion_atom_site_label_1     
_geom_torsion_atom_site_label_2     
_geom_torsion_atom_site_label_3     
_geom_torsion_atom_site_label_4     
_geom_torsion                       
_geom_torsion_site_symmetry_1       
_geom_torsion_site_symmetry_2       
_geom_torsion_site_symmetry_3       
_geom_torsion_site_symmetry_4       
_geom_torsion_publ_flag             
 N2      Y       N1      C4       163.02(16)     .       .       .       .   no 
 N2      Y       N1      C5       -17.42(12)     .       .       .       .   no 
 N3      Y       N1      C4      -161.94(13)     .       .       .       .   no 
 N3      Y       N1      C5        17.63(16)     .       .       .       .   no 
 N4      Y       N1      C4        97.45(15)     .       .       .       .   no 
 N4      Y       N1      C5       -82.98(13)     .       .       .       .   no 
 N5      Y       N1      C4       -96.29(15)     .       .       .       .   no 
 N5      Y       N1      C5        83.27(13)     .       .       .       .   no 
 C20     Y       N1      C4        12.97(17)     .       .       .       .   no 
 C20     Y       N1      C5      -167.46(12)     .       .       .       .   no 
 N1      Y       N2      C6        36.56(11)     .       .       .       .   no 
 N1      Y       N2      C7       152.72(13)     .       .       .       .   no 
 N1      Y       N2      C9       -80.24(12)     .       .       .       .   no 
 N3      Y       N2      C6      -118.06(12)     .       .       .       .   no 
 N3      Y       N2      C7        -1.90(11)     .       .       .       .   no 
 N3      Y       N2      C9       125.14(12)     .       .       .       .   no 
 N4      Y       N2      C6       139.76(12)     .       .       .       .   no 
 N4      Y       N2      C7      -104.07(12)     .       .       .       .   no 
 N4      Y       N2      C9        22.96(11)     .       .       .       .   no 
 N5      Y       N2      C6       -55.84(12)     .       .       .       .   no 
 N5      Y       N2      C7        60.33(12)     .       .       .       .   no 
 N5      Y       N2      C9      -172.64(12)     .       .       .       .   no 
 C20     Y       N2      C6       160.34(12)     .       .       .       .   no 
 C20     Y       N2      C7       -83.49(16)     .       .       .       .   no 
 C20     Y       N2      C9        43.54(18)     .       .       .       .   no 
 N1      Y       N3      C8        -6.94(14)     .       .       .       .   no 
 N1      Y       N3      C13     -130.39(13)     .       .       .       .   no 
 N1      Y       N3      C14      109.66(12)     .       .       .       .   no 
 N2      Y       N3      C8        28.82(10)     .       .       .       .   no 
 N2      Y       N3      C13      -94.63(13)     .       .       .       .   no 
 N2      Y       N3      C14      145.42(12)     .       .       .       .   no 
 N4      Y       N3      C8        94.53(11)     .       .       .       .   no 
 N4      Y       N3      C13      -28.92(13)     .       .       .       .   no 
 N4      Y       N3      C14     -148.87(11)     .       .       .       .   no 
 N5      Y       N3      C8       -83.12(11)     .       .       .       .   no 
 N5      Y       N3      C13      153.43(14)     .       .       .       .   no 
 N5      Y       N3      C14       33.48(10)     .       .       .       .   no 
 C20     Y       N3      C8       177.51(11)     .       .       .       .   no 
 C20     Y       N3      C13       54.06(14)     .       .       .       .   no 
 C20     Y       N3      C14      -65.89(11)     .       .       .       .   no 
 N1      Y       N4      C10       75.62(12)     .       .       .       .   no 
 N1      Y       N4      C11      -41.21(12)     .       .       .       .   no 
 N1      Y       N4      C12     -159.45(12)     .       .       .       .   no 
 N2      Y       N4      C10        6.29(12)     .       .       .       .   no 
 N2      Y       N4      C11     -110.54(12)     .       .       .       .   no 
 N2      Y       N4      C12      131.23(13)     .       .       .       .   no 
 N3      Y       N4      C10      -60.70(12)     .       .       .       .   no 
 N3      Y       N4      C11     -177.53(11)     .       .       .       .   no 
 N3      Y       N4      C12       64.24(13)     .       .       .       .   no 
 C20     Y       N4      C10     -163.25(13)     .       .       .       .   no 
 C20     Y       N4      C11       79.92(12)     .       .       .       .   no 
 C20     Y       N4      C12      -38.31(13)     .       .       .       .   no 
 N1      Y       N5      C15     -153.44(13)     .       .       .       .   no 
 N1      Y       N5      C19       31.96(15)     .       .       .       .   no 
 N2      Y       N5      C15      -79.62(13)     .       .       .       .   no 
 N2      Y       N5      C19      105.78(14)     .       .       .       .   no 
 N3      Y       N5      C15      -16.64(12)     .       .       .       .   no 
 N3      Y       N5      C19      168.76(15)     .       .       .       .   no 
 C20     Y       N5      C15       82.29(13)     .       .       .       .   no 
 C20     Y       N5      C19      -92.31(15)     .       .       .       .   no 
 N1      Y       C20     Si       -93.33(12)     .       .       .       .   no 
 N2      Y       C20     Si        155.53(9)     .       .       .       .   no 
 N3      Y       C20     Si        83.01(12)     .       .       .       .   no 
 N4      Y       C20     Si       174.80(12)     .       .       .       .   no 
 N5      Y       C20     Si        11.92(13)     .       .       .       .   no 
 N1      Y       C20     H20'       31.4(19)     .       .       .       .   no 
 N2      Y       C20     H20        31.5(15)     .       .       .       .   no 
 N2      Y       C20     H20'      -79.8(19)     .       .       .       .   no 
 N3      Y       C20     H20       -41.0(15)     .       .       .       .   no 
 N3      Y       C20     H20'     -152.3(19)     .       .       .       .   no 
 N4      Y       C20     H20        50.7(15)     .       .       .       .   no 
 N4      Y       C20     H20'      -60.5(19)     .       .       .       .   no 
 N5      Y       C20     H20      -112.1(15)     .       .       .       .   no 
 N5      Y       C20     H20'      136.6(19)     .       .       .       .   no 
 N1      Y       C20     H20       142.6(15)     .       .       .       .   no 
 C22     Si      C20     Y        164.47(12)     .       .       .       .   no 
 C23     Si      C20     Y         44.35(14)     .       .       .       .   no 
 C21     Si      C20     Y        -77.47(14)     .       .       .       .   no 
 C23     Si      C22     H22      -177.9(16)     .       .       .       .   no 
 C21     Si      C22     H22'       57.2(18)     .       .       .       .   no 
 C21     Si      C22     H22"     -178.4(18)     .       .       .       .   no 
 C20     Si      C22     H22"      -56.3(19)     .       .       .       .   no 
 C21     Si      C22     H22       -63.8(16)     .       .       .       .   no 
 C22     Si      C21     H21"     -164.9(19)     .       .       .       .   no 
 C23     Si      C21     H21        70.5(14)     .       .       .       .   no 
 C23     Si      C21     H21'     -170.5(18)     .       .       .       .   no 
 C23     Si      C21     H21"      -52.3(19)     .       .       .       .   no 
 C20     Si      C22     H22        58.3(16)     .       .       .       .   no 
 C20     Si      C22     H22'      179.3(18)     .       .       .       .   no 
 C22     Si      C23     H23"      -60.6(16)     .       .       .       .   no 
 C21     Si      C20     H20'      157.9(17)     .       .       .       .   no 
 C22     Si      C20     H20       -73.1(15)     .       .       .       .   no 
 C22     Si      C20     H20'       39.8(17)     .       .       .       .   no 
 C23     Si      C20     H20       166.7(15)     .       .       .       .   no 
 C23     Si      C20     H20'      -80.3(17)     .       .       .       .   no 
 C20     Si      C21     H21      -165.1(14)     .       .       .       .   no 
 C20     Si      C21     H21'      -46.1(18)     .       .       .       .   no 
 C20     Si      C21     H21"       72.0(19)     .       .       .       .   no 
 C22     Si      C21     H21       -42.1(14)     .       .       .       .   no 
 C22     Si      C21     H21'       76.9(18)     .       .       .       .   no 
 C21     Si      C23     H23        62.8(14)     .       .       .       .   no 
 C21     Si      C23     H23'      -57.8(16)     .       .       .       .   no 
 C21     Si      C23     H23"     -172.5(16)     .       .       .       .   no 
 C22     Si      C23     H23       174.6(14)     .       .       .       .   no 
 C22     Si      C23     H23'       54.0(16)     .       .       .       .   no 
 C21     Si      C20     H20        44.9(15)     .       .       .       .   no 
 C20     Si      C23     H23'      178.3(16)     .       .       .       .   no 
 C20     Si      C23     H23"       63.6(16)     .       .       .       .   no 
 C23     Si      C22     H22"       67.5(19)     .       .       .       .   no 
 C20     Si      C23     H23       -61.1(14)     .       .       .       .   no 
 C23     Si      C22     H22'      -56.9(18)     .       .       .       .   no 
 Y       N1      C4      C1          -6.6(2)     .       .       .       .   no 
 Y       N1      C4      C2       112.08(17)     .       .       .       .   no 
 Y       N1      C5      C6          -6.5(2)     .       .       .       .   no 
 C4      N1      C5      C6       173.11(15)     .       .       .       .   no 
 C5      N1      C4      C1       173.84(17)     .       .       .       .   no 
 C5      N1      C4      C2         -67.5(2)     .       .       .       .   no 
 Y       N1      C4      C3      -125.67(17)     .       .       .       .   no 
 C5      N1      C4      C3          54.7(2)     .       .       .       .   no 
 Y       N2      C6      C5       -54.50(17)     .       .       .       .   no 
 C7      N2      C6      C5      -173.89(16)     .       .       .       .   no 
 C6      N2      C7      C8        83.53(19)     .       .       .       .   no 
 C9      N2      C7      C8      -153.08(16)     .       .       .       .   no 
 Y       N2      C9      C10      -51.41(17)     .       .       .       .   no 
 C6      N2      C9      C10     -160.16(15)     .       .       .       .   no 
 C7      N2      C9      C10       77.20(19)     .       .       .       .   no 
 C9      N2      C6      C5          62.8(2)     .       .       .       .   no 
 Y       N2      C7      C8       -25.72(18)     .       .       .       .   no 
 C13     N3      C14     C15     -176.83(15)     .       .       .       .   no 
 C8      N3      C14     C15       63.37(19)     .       .       .       .   no 
 Y       N3      C8      C7       -55.08(16)     .       .       .       .   no 
 C13     N3      C8      C7          73.8(2)     .       .       .       .   no 
 C14     N3      C8      C7      -167.65(15)     .       .       .       .   no 
 Y       N3      C14     C15      -49.86(16)     .       .       .       .   no 
 C12     N4      C10     C9      -164.71(17)     .       .       .       .   no 
 C11     N4      C10     C9          78.4(2)     .       .       .       .   no 
 Y       N4      C10     C9       -34.56(19)     .       .       .       .   no 
 Y       N5      C15     C14       -4.02(19)     .       .       .       .   no 
 C15     N5      C19     C18        -20.7(2)     .       .       .       .   no 
 C19     N5      C15     C14      171.23(15)     .       .       .       .   no 
 C19     N5      C15     C16         47.2(2)     .       .       .       .   no 
 Y       N5      C15     C16     -128.01(13)     .       .       .       .   no 
 Y       N5      C19     C18      154.42(15)     .       .       .       .   no 
 N1      C5      C6      N2          46.0(2)     .       .       .       .   no 
 N2      C7      C8      N3          56.4(2)     .       .       .       .   no 
 N2      C9      C10     N4          59.1(2)     .       .       .       .   no 
 N3      C14     C15     C16      161.71(15)     .       .       .       .   no 
 N3      C14     C15     N5          38.5(2)     .       .       .       .   no 
 N5      C15     C16     C17        -43.3(2)     .       .       .       .   no 
 C14     C15     C16     C17     -165.74(17)     .       .       .       .   no 
 C15     C16     C17     C18          9.9(3)     .       .       .       .   no 
 C16     C17     C18     C19         19.2(3)     .       .       .       .   no 
 C17     C18     C19     N5         -13.6(3)     .       .       .       .   no 

loop_
_geom_contact_atom_site_label_1     
_geom_contact_atom_site_label_2     
_geom_contact_distance              
_geom_contact_site_symmetry_1       
_geom_contact_site_symmetry_2       
_geom_contact_publ_flag             
 Y       H1'         3.31(2)                     .       .                   no 
 Y       H1"         3.02(2)                     .       .                   no 
 Y       H23         3.89(2)                     .       .                   no 
 N1      H9        2.908(19)                     .       .                   no 
 N5      H8        2.755(19)                     .       .                   no 
 C6      C19        3.582(3)                     .     3_656                 no 
 C8      C17        3.572(3)                     .     3_556                 no 
 C17     C8         3.572(3)                     .     3_556                 no 
 C19     C6         3.582(3)                     .     3_656                 no 
 C2      H5'       2.769(19)                     .       .                   no 
 C2      H19         3.00(2)                     .       .                   no 
 C2      H9'       3.037(19)                     .       .                   no 
 C3      H5          2.61(2)                     .       .                   no 
 C5      H3'         2.72(2)                     .       .                   no 
 C5      H9        2.510(19)                     .       .                   no 
 C5      H2"       2.812(19)                     .       .                   no 
 C6      H8        2.901(19)                     .       .                   no 
 C7      H10       2.809(19)                     .       .                   no 
 C7      H13'        2.74(2)                     .       .                   no 
 C8      H15       2.844(19)                     .       .                   no 
 C8      H6          2.78(2)                     .       .                   no 
 C9      H11         2.80(2)                     .       .                   no 
 C9      H5          2.85(2)                     .       .                   no 
 C10     H7          2.69(2)                     .       .                   no 
 C11     H9        2.812(19)                     .       .                   no 
 C11     H22"        3.02(3)                     .     3_556                 no 
 C11     H1'       3.093(19)                     .       .                   no 
 C12     H20         2.92(2)                     .       .                   no 
 C13     H7          2.80(2)                     .       .                   no 
 C13     H12         2.96(2)                     .       .                   no 
 C15     H8        2.555(19)                     .       .                   no 
 C16     H21"        2.92(3)                     .       .                   no 
 C16     H8'         2.97(2)                     .     3_556                 no 
 C17     H8'         2.97(2)                     .     3_556                 no 
 C18     H15       2.912(19)                     .       .                   no 
 C18     H6'         3.02(2)                     .     3_656                 no 
 C18     H23         3.07(3)                     .       .                   no 
 C19     H23         2.88(2)                     .       .                   no 
 C19     H6'         2.86(2)                     .     3_656                 no 
 C20     H12"        2.90(2)                     .       .                   no 
 C21     H14       3.012(18)                     .       .                   no 
 C22     H13         3.06(2)                     .     2_545                 no 
 C23     H1"         3.10(2)                     .       .                   no 
 H1      H2          2.44(3)                     .       .                   no 
 H1      H3          2.52(3)                     .       .                   no 
 H1'     Y           3.31(2)                     .       .                   no 
 H1'     C11       3.093(19)                     .       .                   no 
 H1'     H3"         2.44(3)                     .       .                   no 
 H1'     H11"        2.57(3)                     .       .                   no 
 H1"     Y           3.02(2)                     .       .                   no 
 H1"     C23         3.10(2)                     .       .                   no 
 H1"     H2'         2.54(3)                     .       .                   no 
 H1"     H23"        2.59(4)                     .       .                   no 
 H2      H1          2.44(3)                     .       .                   no 
 H2      H3          2.47(3)                     .       .                   no 
 H2      H9'         2.48(3)                     .       .                   no 
 H2'     H1"         2.54(3)                     .       .                   no 
 H2'     H19         2.26(3)                     .       .                   no 
 H2"     C5        2.812(19)                     .       .                   no 
 H2"     H3'         2.58(3)                     .       .                   no 
 H2"     H5'         2.29(3)                     .       .                   no 
 H3      H1          2.52(3)                     .       .                   no 
 H3      H2          2.47(3)                     .       .                   no 
 H3'     C5          2.72(2)                     .       .                   no 
 H3'     H2"         2.58(3)                     .       .                   no 
 H3'     H5          2.25(3)                     .       .                   no 
 H3'     H13"        2.48(3)                     .     1_565                 no 
 H3"     H1'         2.44(3)                     .       .                   no 
 H3"     H11         2.41(3)                     .       .                   no 
 H3"     H22"        2.58(4)                     .     3_556                 no 
 H5      C3          2.61(2)                     .       .                   no 
 H5      C9          2.85(2)                     .       .                   no 
 H5      H3'         2.25(3)                     .       .                   no 
 H5      H9          2.14(3)                     .       .                   no 
 H5'     C2        2.769(19)                     .       .                   no 
 H5'     H2"         2.29(3)                     .       .                   no 
 H6      C8          2.78(2)                     .       .                   no 
 H6      H7'         2.58(3)                     .       .                   no 
 H6      H8          2.25(3)                     .       .                   no 
 H6'     H7'         2.35(3)                     .       .                   no 
 H6'     C18         3.02(2)                     .     3_656                 no 
 H6'     C19         2.86(2)                     .     3_656                 no 
 H6'     H19         2.56(3)                     .     3_656                 no 
 H7      C10         2.69(2)                     .       .                   no 
 H7      C13         2.80(2)                     .       .                   no 
 H7      H9'         2.42(3)                     .       .                   no 
 H7      H10         2.17(3)                     .       .                   no 
 H7      H13'        2.22(3)                     .       .                   no 
 H7'     H6          2.58(3)                     .       .                   no 
 H7'     H6'         2.35(3)                     .       .                   no 
 H8      N5        2.755(19)                     .       .                   no 
 H8      C6        2.901(19)                     .       .                   no 
 H8      C15       2.555(19)                     .       .                   no 
 H8      H6          2.25(3)                     .       .                   no 
 H8      H15         2.19(3)                     .       .                   no 
 H8'     H13"        2.40(3)                     .       .                   no 
 H8'     H14'        2.54(3)                     .       .                   no 
 H8'     C16         2.97(2)                     .     3_556                 no 
 H8'     C17         2.97(2)                     .     3_556                 no 
 H9      N1        2.908(19)                     .       .                   no 
 H9      C5        2.510(19)                     .       .                   no 
 H9      C11       2.812(19)                     .       .                   no 
 H9      H5          2.14(3)                     .       .                   no 
 H9      H11         2.26(3)                     .       .                   no 
 H9'     C2        3.037(19)                     .     1_565                 no 
 H9'     H2          2.48(3)                     .     1_565                 no 
 H9'     H7          2.42(3)                     .       .                   no 
 H10     C7        2.809(19)                     .       .                   no 
 H10     H7          2.17(3)                     .       .                   no 
 H10     H12         2.32(3)                     .       .                   no 
 H10     H13'        2.48(3)                     .       .                   no 
 H10'    H11'        2.32(3)                     .       .                   no 
 H10'    H12'        2.50(3)                     .       .                   no 
 H11     C9          2.80(2)                     .       .                   no 
 H11     H3"         2.41(3)                     .       .                   no 
 H11     H9          2.26(3)                     .       .                   no 
 H11'    H10'        2.32(3)                     .       .                   no 
 H11'    H12'        2.47(3)                     .       .                   no 
 H11"    H1'         2.57(3)                     .       .                   no 
 H11"    H12"        2.34(3)                     .       .                   no 
 H12     C13         2.96(2)                     .       .                   no 
 H12     H10         2.32(3)                     .       .                   no 
 H12     H13'        2.45(3)                     .       .                   no 
 H12'    H10'        2.50(3)                     .       .                   no 
 H12'    H11'        2.47(3)                     .       .                   no 
 H12'    H12'        2.53(3)                     .     1_565                 no 
 H12"    C20         2.90(2)                     .       .                   no 
 H12"    H11"        2.34(3)                     .       .                   no 
 H12"    H20         2.32(3)                     .       .                   no 
 H13     H14         2.32(3)                     .       .                   no 
 H13     C22         3.06(2)                     .     2_555                 no 
 H13'    C7          2.74(2)                     .       .                   no 
 H13'    H7          2.22(3)                     .       .                   no 
 H13'    H10         2.48(3)                     .       .                   no 
 H13'    H12         2.45(3)                     .       .                   no 
 H13"    H8'         2.40(3)                     .       .                   no 
 H13"    H14'        2.39(3)                     .       .                   no 
 H13"    H3'         2.48(3)                     .     2_545                 no 
 H14     C21       3.012(18)                     .       .                   no 
 H14     H13         2.32(3)                     .       .                   no 
 H14     H16         2.52(3)                     .       .                   no 
 H14     H21"        2.39(3)                     .       .                   no 
 H14'    H8'         2.54(3)                     .       .                   no 
 H14'    H13"        2.39(3)                     .       .                   no 
 H15     C8        2.844(19)                     .       .                   no 
 H15     C18       2.912(19)                     .       .                   no 
 H15     H8          2.19(3)                     .       .                   no 
 H15     H17         2.55(3)                     .     3_556                 no 
 H16     H14         2.52(3)                     .       .                   no 
 H17     H15         2.55(3)                     .     3_556                 no 
 H19     C2          3.00(2)                     .       .                   no 
 H19     H2'         2.26(3)                     .       .                   no 
 H19     H6'         2.56(3)                     .     3_656                 no 
 H20     C12         2.92(2)                     .       .                   no 
 H20     H12"        2.32(3)                     .       .                   no 
 H20     H22'        2.36(3)                     .     2_555                 no 
 H21"    C16         2.92(3)                     .       .                   no 
 H21"    H14         2.39(3)                     .       .                   no 
 H22     H23'        2.52(4)                     .     2_555                 no 
 H22'    H20         2.36(3)                     .     2_545                 no 
 H22"    C11         3.02(3)                     .     3_556                 no 
 H22"    H3"         2.58(4)                     .     3_556                 no 
 H23     Y           3.89(2)                     .       .                   no 
 H23     C18         3.07(3)                     .       .                   no 
 H23     C19         2.88(2)                     .       .                   no 
 H23'    H22         2.52(4)                     .     2_545                 no 
 H23"    H1"         2.59(4)                     .       .                   no 

# End of Crystallographic Information File
